1 **Dissecting lipid contents in the distinct regions of native retinal rod disk membranes**

2  
3 Christopher L. Sander<sup>1,2</sup>, Avery E. Sears<sup>1,2</sup>, Antonio F. M. Pinto<sup>3</sup>, Elliot H. Choi<sup>1,2</sup>, Shirin Kahremany<sup>2</sup>,  
4 Hui Jin<sup>1</sup>, Els Pardon<sup>3</sup>, Susie Suh<sup>1,2</sup>, Zhiqian Dong<sup>2</sup>, Jan Steyaert<sup>3</sup>, Alan Saghatelian<sup>4</sup>, Dorota Skowronska-  
5 Krawczyk<sup>2,5,\*</sup>, Philip D. Kiser<sup>2,5,6,\*</sup>, Krzysztof Palczewski<sup>2,5,7\*</sup>

6  
7 <sup>1</sup>Department of Pharmacology, Case Western Reserve University, Cleveland, Ohio, USA 44106;

8 <sup>2</sup>Department of Ophthalmology, Gavin Herbert Eye Institute, University of California, Irvine, California,

9 USA 92697; <sup>3</sup>Structural Biology Brussels, Vrije Universiteit Brussel (VUB), Brussels, 1050, Belgium and

10 VIB-VUB Center for Structural Biology, VIB, Brussels, 1050, Belgium; <sup>4</sup>Clayton Foundation Laboratories

11 for Peptide Biology, Salk Institute for Biological Studies, La Jolla, California, USA 92037; <sup>5</sup>Department of

12 Physiology & Biophysics, University of California, Irvine, California, USA 92697; <sup>6</sup>Research Service, VA

13 Long Beach Healthcare System, Long Beach, California, USA 90822; <sup>7</sup>Department of Chemistry,

14 University of California, Irvine, California, USA 92697

15  
16 Running title: Distinct membrane environments of ROS disks

17  
18 \*To whom correspondence should be addressed: Krzysztof Palczewski: Gavin Herbert Eye Institute,

19 Department of Ophthalmology; 850 Health Sciences Road, University of California, Irvine, CA 92697-

20 4375, kpalczew@uci.edu, ORCID: 0000-0002-0788-545X; or Philip D. Kiser: pkiser@uci.edu, ORCID:

21 0000-0003-1184-9539; or Dorota Skowronska-Krawczyk, dorotask@uci.edu, ORCID: 0000-0002-5758-

22 4225

23 **Keywords:** ATP-binding cassette (ABC), lipidomics, long chain-polyunsaturated fatty acid (LC-PUFA),

24 very long chain-polyunsaturated fatty acid (VLC-PUFA), PRPH22/ROM1, retina, rhodopsin, styrene

25 maleic acid (SMA)

26 **SUMMARY**

27 Sander et al. have parsed the lipid composition of native-source photoreceptor disks and find large  
28 differences in fatty acid unsaturation and chain length between the center and rim regions. They selectively  
29 copurify membrane proteins and lipids from each region in SMALPs using nanobodies and antibodies.

30

31 **ABSTRACT**

32 Photoreceptors rely on distinct membrane compartments to support their specialized function.  
33 Unlike protein localization, identification of critical differences in membrane content has not yet been  
34 expanded to lipids, due to the difficulty of isolating domain-specific samples. We have overcome this by  
35 using SMA to co-immunopurify membrane proteins and their native lipids from two regions of  
36 photoreceptor ROS disks. Each sample's copurified lipids were subjected to untargeted lipidomic and fatty  
37 acid analysis. Extensive differences between center (rhodopsin) and rim (ABCA4 and PRPH2/ROM1)  
38 samples included a lower PC to PE ratio and increased LC- and VLC-PUFAs in the center relative to the  
39 rim region, which were enriched in shorter, saturated FAs. The comparatively few differences between the  
40 two rim samples likely reflect specific protein-lipid interactions. High-resolution profiling of the ROS disk  
41 lipid composition provides a model for future studies of other complex cellular structures, and gives new  
42 insights into how intricate membrane structure and protein activity are balanced within the ROS.

43

44 **INTRODUCTION**

45 Photoreceptor cells of the retina are highly differentiated neurons responsible for the capture of  
46 light and conversion of its energy to the biochemical amplification cascade known as phototransduction.  
47 Each of these cells has a highly elongated cilium called the rod outer segment (ROS), which is composed  
48 of an internal stack of membranous disks surrounded by plasma membrane. Roughly 40 million molecules  
49 of rhodopsin are packed into each ROS, and each light-activated rhodopsin is capable of binding and  
50 activating many molecules of transducin (the G protein of the visual system) (Fung et al., 1981; Nathans,

*Distinct membrane environments of ROS disks*

51 1992; Polans et al., 1996; Heck and Hofmann, 2001). To accommodate the uniquely dynamic, yet  
52 exquisitely structured environment, ROS disks contain specialized lipids rich in long chain and very long  
53 chain polyunsaturated fatty acids (LC-PUFAs and VLC-PUFAs, respectively). The disks are also known  
54 to have significantly higher levels of phosphatidylethanolamine (PE) than are typically found in plasma  
55 membranes. This overabundance of PE is compensated by a relative scarcity of phosphatidylcholine and  
56 phosphatidylserine (PC and PS, respectively) in ROS membranes (Boesze-Battaglia and Albert, 1992).  
57 Cholesterol has also been found to be necessary for rhodopsin activity; however, excessively high  
58 concentrations of cholesterol reduce its signaling (Mitchell et al., 1990, 1992a). Indeed, many components  
59 of the membrane can have a profound impact on the function of the membrane proteins therein, making  
60 high-resolution study of membrane environments critical to the overall characterization of membrane  
61 proteins. Early work by Falk and Fatt on the ultra-structure of ROS membranes showed a remarkable ability  
62 of the outer rim region of ROS disks to resist disruption in the presence of Tris buffer after OsO<sub>4</sub> fixation  
63 (Falk and Fatt, 1969). Their work gives an indication that the membranes in the rim region are distinct from  
64 the center, but concrete evidence in support of this has not yet been offered.

65 The current lack of knowledge regarding molecular differences between the center and rim of ROS  
66 disk membranes represents a significant bottleneck in the study of lipid synthesis, metabolism, and transport  
67 (Zhang et al., 2001; Edwards et al., 2001; Chen et al., 2005, 2007; Berdeaux et al., 2010; Sapiuha et al.,  
68 2011; Chen et al., 2013, 2020). These processes modulate the impact of lipids on retinal degenerative  
69 diseases, such as Stargardt-like macular dystrophy type 3, retinitis pigmentosa, diabetic retinopathy, and  
70 age-related macular degeneration (Simonelli et al., 1996; Bernstein et al., 2001; Seddon, 2003, 2006;  
71 SanGiovanni et al., 2007; Liu et al., 2010; Tikhonenko et al., 2010, 2013; Logan et al., 2013; Logan and  
72 Anderson, 2014; Hiebler et al., 2014). Mapping the possible lipid domains in which vision-related  
73 membrane proteins reside would be an invaluable contribution to the study of protein-lipid interactions.

74 The coupled processes of phototransduction and the visual cycle utilize several membrane proteins.  
75 Rhodopsin, the prototypical G protein-coupled receptor (GPCR) responsible for initiating  
76 phototransduction, appears to prefer limited cholesterol content for optimal activity (Mitchell et al., 1992b;

*Distinct membrane environments of ROS disks*

77 Palczewski, 2006). Rhodopsin also exhibits maximal activity in a phospholipid environment with a high  
78 proportion of docosahexaenoic acid (DHA, 22:6) (Mitchell et al., 1992b). In the rim of ROS disks, ATP-  
79 binding cassette protein, family A, number 4 (ABCA4) assists in chromophore clearance from the ROS  
80 disk through *N*-retinylidene-phosphatidylethanolamine flippase activity. Prior work has shown that this  
81 lipid and all-*trans* retinal flippase is optimally active when the membrane contains at least 40% PE; it shows  
82 no activity in pure phosphatidylcholine (PC) liposomes (Sun and Nathans, 2001; Quazi and Molday, 2013;  
83 Quazi et al., 2012). Such high levels of PE are common in the native disk membranes of ROS (Daemen,  
84 1973). The peripherin2-ROS membrane protein 1 (PRPH2/ROM1) complex is also found in the rim of ROS  
85 disks (Molday et al., 1987). PRPH2/ROM1 does not exhibit enzymatic activity, but is an essential  
86 component of disk morphogenesis and maintenance of the curved, bulbous rim of ROS disks (Goldberg  
87 and Molday, 1996a; b; Loewen and Molday, 2000; Kevany et al., 2013; Zulliger et al., 2018; Milstein et  
88 al., 2020).

89         The recent advent of styrene-maleic acid lipid particles (SMALPs) has made it possible to extract  
90 the membrane bilayer into discrete disks containing the proteins therein (Knowles et al., 2009; Jamshad et  
91 al., 2011). However, there remains a question regarding the nativity of SMALP-encased membranes; *i.e.*,  
92 do lipids “copurified” with native proteins represent the environment from which the protein was extracted?  
93 Accordingly, there have been recent reports on the lipid exchange dynamics of polymer-bound lipid  
94 nanodiscs (Cuevas Arenas et al., 2017; Schmidt and Sturgis, 2018; Danielczak and Keller, 2018). These  
95 studies showed that phospholipids extracted in SMALPs and diisobutylene maleic acid lipid particles  
96 (DIBMALPs) exchange rapidly, orders of magnitude faster than in large unilamillar vesicles (LUVs) or  
97 membrane scaffold protein (MSP) nanodiscs. These findings suggest that native membrane proteins, once  
98 extracted by SMA, might reside in a lipid environment that reflects the average lipid environment of the  
99 extracted tissue.

100         ROS disks provide an interesting test case for the potential rearrangement of lipids around native  
101 proteins extracted by SMA, because the disk rim contains a different protein population than the disk center.  
102 It is reasonable to expect that the center of the ROS disk maintains a unique environment, as rhodopsin is

## *Distinct membrane environments of ROS disks*

103 thought to pack in a paracrystalline manner while requiring ample free volume in the membrane for high  
104 levels of signaling (Mitchell et al., 1992b; Fotiadis et al., 2004). The ROS rim, however, needs to adopt and  
105 maintain a curved and bulbous structure. To investigate whether the lipid exchange rate in the case of  
106 mammalian native tissue is slow enough to enable retention of the local lipid environment, we chose to  
107 purify ABCA4 and rhodopsin from SMA-extracted ROS. Different copurifying lipids in each purified  
108 protein sample would suggest retention of the native membrane environments in the respective SMALPs.  
109 To confirm the membranes are native in composition and not the result of *post hoc* segregation, we purified  
110 an additional protein complex, PRPH2/ROM1, from the rim region, with the hypothesis that if SMALPs  
111 retain native membrane environments, we should observe similar lipid profiles between rim samples and  
112 conserved differences between rim and central samples.

113 Here, we report the isolation of the specific lipid environments surrounding rhodopsin, ABCA4,  
114 and the PRPH2/ROM1 complex (**Fig. 1, a and b**). The membrane composition analysis specific to these  
115 proteins will facilitate our understanding on the effect of membrane components on the protein function.

116

## 117 **RESULTS**

### 118 *SMA extraction of ROS membrane proteins and development of mAb against ABCA4*

119 We began by searching for a method of copurifying lipids in the immediate vicinity of each  
120 representative ROS membrane protein (**Fig. 1**). SMA showed a strong capacity for solubilizing ROS  
121 membrane proteins (**Fig. 1 a, Fig. S1 a**). The higher yield of total protein obtained from ROS extracted in  
122 SMA also showed near-complete extraction of the available ABCA4, as shown by immunoblot analysis  
123 (**Fig. S1 b**). Optimum extraction of ABCA4 in SMA occurred at 2.5% w/v and was essentially complete;  
124 in contrast, 2% LMNG (roughly 2000x the CMC) resulted in roughly 50% solubilization.

125 The C-terminal region of ABCA4 is an accessible site that contains a high affinity binding epitope  
126 for the Rim3F4 antibody (YDLPLHPRT) (Illing et al., 1997). The Rim3F4 antibody has very good affinity  
127 for the C-terminus of ABCA4, but immunopurification of ABCA4 proved difficult, given the low efficiency  
128 of elution from the column. We designed the CL2 monoclonal antibody to overcome low immunoaffinity

*Distinct membrane environments of ROS disks*

129 efficiency by targeting an expanded region of the C-terminus. To develop a novel epitope near this site on  
130 the C-terminus, a 26 amino acid peptide (NETYDLPLHPRTAGASRQAKEVDKGC) from the near-  
131 extreme end of bovine ABCA4 (with the addition of a C-terminal cysteine) was synthesized and conjugated  
132 to keyhole limpet hemocyanin (KLH) protein to induce an immunogenic response in mice. **Fig. S1 c** shows  
133 the location and length of the resultant antibody binding site for CL2, in comparison to the locations of the  
134 antibody binding sites for Rim3F4 and TMR4 (Zhang et al., 2015), another antibody that targets the second  
135 extracytosolic domain.

136 Dot blot analysis of CL2 was conducted to determine whether the paratope was different from that  
137 of Rim3F4 (**Fig. S1 d**). Various cleavage products of the polypeptide, made by sequentially omitting two  
138 amino acids from each end, were adsorbed onto the membrane and then probed for CL2 binding. Compared  
139 to the full-length peptide, none of the putative sub-epitopes bound CL2 with nearly the same affinity. When  
140 the first residues were removed ( $\Delta$ F2-6), there was a complete loss of binding, suggesting that they are  
141 integral to CL2 recognition. The affinities of those peptides missing the last few residues ( $\Delta$ L2-6) were  
142 much weaker than that of the full-length sequence, indicating that both ends of the epitope are important  
143 for robust binding of CL2, and that CL2 uses a different epitope than Rim3F4. CL2 showed a relative lack  
144 of signal in the immunoblot of solubilized bovine ROS (**Fig. S1 f**). In comparison to Rim3F4 and TMR4,  
145 CL2 showed a weak but specific signal for ABCA4.

146 The relatively weak binding of CL2 was also apparent in murine samples (**Fig. S1 e and g**). The  
147 immunohistochemical analysis of murine retinas showed a gradual increase in ABCA4 signal intensity in  
148 samples stained with higher levels (lesser dilutions) of CL2 (**Fig. S1 e**). This staining profile contrasted  
149 with the profile for Rim3F4, which showed a robust signal in the outer segments even with the greatest  
150 dilution. CL2 showed a level of signal comparable to that of Rim3F4 for the same murine samples *via*  
151 immunoblots; and also showed comparable specificity, with no ABCA4 detected by CL2 or Rim3F4 in  
152 isolated, murine RPE, although small amounts have been reported to be expressed there (**Fig. S1 g**) (Lenis  
153 et al., 2018).

154

155 ***Detergent free purification of ABCA4 with CL2 antibody and electron microscopy imaging***

156 SMA-extracted bovine ROS was incubated with CL2-conjugated immunoaffinity resin (**Fig. 1 c**).  
157 Elution of ABCA4 with the known epitope peptide produced a concentrated and pure sample of ABCA4  
158 (**Fig. 1 c**, “Elu” & “EW” lanes), with large amounts of elution peptide and characteristic SMA-smearing  
159 seen at the bottom of these lanes. The elution and subsequent wash from the immunoaffinity purification  
160 were then pooled and concentrated for size exclusion chromatography (SEC) (**Fig. 1 d**). To characterize  
161 possible morphological changes to ABCA4 in the SMALP, the purified samples were prepared for negative  
162 stain transmission electron microscopy (nsTEM). nsTEM micrographs showed monodisperse, homogenous  
163 ABCA4 particles (**Fig. S1 h**, left). Clear 2D class averages were made from particles picked by an unbiased  
164 autopicking feature of cisTEM (**Fig. S1 h**, right) (Grant et al., 2018). The resultant *de novo* 3D model,  
165 obtained using the cisTEM’s *de novo* reference map generator, showed significantly more density in the  
166 transmembrane domain (TMD) region than the prior nsTEM-generated structure of ABCA4 (**Fig. S1 i**).  
167 After refining, the roughly 4 nm-thick TMD showed a diameter of roughly 12 nm, which was larger than  
168 the previously published nsTEM model in the presence of detergent (EMDB-5497, orange) (**Fig. S1 j**)  
169 (Tsybovsky et al., 2013). The increased density did not confirm the presence of lipids in the TMD, and the  
170 possibility existed that more stain could have adhered to the TMD of the SMA-extracted protein. When  
171 considered in light of all of the results reported herein, however, we suspect the increased density was due  
172 to copurified lipids. The other proportions obtained agreed well with the published ABCA4 nsTEM model  
173 and the general size and shape of ABCA1 (EMDB-6724, purple ribbon), determined by cryoTEM in 0.06%  
174 digitonin (**Fig. S1 i and j**) (Qian et al., 2017).

175 ***Detergent free purification of PRPH2/ROM1 with novel nanobody Nb19***

176 We developed a novel nanobody to pulldown PRPH2/ROM1 *via* an added His<sub>6</sub> tag on the nanobody  
177 (**Fig. 1 e and f, Fig. 2**). All nanobodies share similar topology, they primarily vary in the hinge regions  
178 (H1, H2, etc.) which, upon folding, create complimentary determining regions (CDR’s) that constitute the  
179 paratope (**Fig. 2 a-c**). We selected, purified, and expressed 5 Nbs (Nb13, Nb19, Nb20, Nb28, and Nb32)  
180 representing different sequence families, each family grouped by CDR sequences (**Fig. 2 b and d**) (Pardon



*Distinct membrane environments of ROS disks*

181 et al., 2014). All of the nanobodies bound tightly to pre-purified PRPH2/ROM1 sample as monitored by  
182 SEC (**Fig. 2 e**). Nb19 proved to be the most efficient binder of the five; immunoprecipitation of  
183 PRPH2/ROM1 from extracted ROS (utilizing the His<sub>6</sub> tag on the nanobody to bind Ni<sup>2+</sup>-resin) gave the  
184 highest yield (**Fig. 2 f**). The resulting PRPH2/ROM1-Nb19 complex was of sufficient purity after elution  
185 from Ni<sup>2+</sup>-resin to analyze its copurifying lipids directly (**Fig. 1 e**).

186 ***SMALP-encapsulated ABCA4 and rhodopsin retain ligand binding capacity***

187 Assessing the activity of ABC transporters in SMA presents a challenge because the low millimolar  
188 concentrations of magnesium preferred for efficient coordination of ATP to the Walker A binding site of  
189 ABC transporters precipitates SMA (Oluwole et al., 2017). The correct folding and nucleotide binding of  
190 ABC transporters in SMALPs can be assessed *via* tryptophan fluorescence quenching with increasing  
191 concentrations of ATP in the absence of magnesium (Gulati et al., 2014). Using this assay, we confirmed  
192 that the SMA-purified ABCA4 is able to bind ATP ( $K_D = 133.5 \mu\text{M}$ ), albeit with lower affinity than reported  
193 in the presence of magnesium (**Fig. 3 a**) (Ahn et al., 2000).

194 We also assessed the ability of rhodopsin to bleach and regenerate in SMALPs (**Fig. 3 b**).  
195 Rhodopsin was purified using the 1D4 antibody that had been developed previously and is well established  
196 for protein purification in detergent-solubilized conditions (**Fig. 1 g**) (Molday and Molday, 2014). The  
197 protein retained its chromophore when purified in the dark, which suggested that the rhodopsin was purified  
198 intact and could hold the chromophore while in the SMALPs. We subsequently found the SMA-purified  
199 rhodopsin was able to efficiently bleach by light, with and without hydroxylamine to scavenge the  
200 chromophore, showing that the protein either has sufficient free volume or the SMALP has enough  
201 flexibility to undergo conformational changes. Rhodopsin was also able to regenerate efficiently with 9-  
202 *cis*-retinal, as shown by the reappearance of the characteristic absorbance peak of the opsin-chromophore  
203 complex at 487 nm (Hubbard and Wald, 1952). The regenerated samples were stable and soluble for days  
204 at room temperature. These results highlight the ability of SMALPs to efficiently extract this model GPCR  
205 in a stable form from its native, mammalian tissue, as has been done in cell lines and lower species with



*Distinct membrane environments of ROS disks*

206 other GPCRs (Jamshad et al., 2015; Gakhar et al., 2020; Ganapathy et al., 2020; Bada Juarez et al., 2020;  
207 Routledge et al., 2020; Ueta et al., 2020).

208 *Untargeted lipidomic analysis of native SMALPs documents different membrane environments for*  
209 *ABCA4, PRPH2/ROM1, and rhodopsin*

210 With SMALP-extracted, immunopurified samples of these three representative membrane proteins  
211 in hand, we carried out a high-resolution study of the lipid environments of each protein. Lipidomic analysis  
212 indicated that the SMALPs were able to extract more than phospholipids from native ROS membranes (**Figs.**  
213 **4 and 5, Figs. S2-5**). We detected many metabolites and other lipids, including acylcarnitines (AcCa),  
214 ceramides (Cer), cholesterol esters (ChE), mono- di- and triacylglycerols (MG, DG, and TG, respectively),  
215 free fatty acids (FFA), cardiolipin (CL) and several lyso-phospholipids (LPC, LPE, and LPA). There were  
216 many distinctions in the relative species composition within these lipid classes. In general, we observed the  
217 samples of SMA-extracted ROS (starting material) and rhodopsin had similar compositions (as would be  
218 expected given the large share of the ROS occupied by rhodopsin). Likewise, we found that the SMALPs  
219 of ABCA4 and PRPH2/ROM1, which both reside in the rim region, had similar species distributions within  
220 each lipid class. As a percentage of the total lipid class, the samples from the rim region lacked AcCa(16:0),  
221 which was balanced by a relative enrichment of AcCa(22:4) (**Fig. 4 a**). There was no gradual increase in  
222 the chain lengths up to AcCa(22:4) in the rim samples, suggesting that free carnitine becomes conjugated  
223 to the 22:4 FA directly, and that the resultant AcCa(22:4) is not metabolized as quickly as species of similar  
224 length. The rim samples showed a relative abundance of Cer(d18:1\_18:0) as compared to the rhodopsin  
225 samples, whereas the rhodopsin samples showed a relative abundance of Cer(d18:1\_22:0),  
226 Cer(d18:1\_24:1), and Cer(d18:2\_24:0), suggesting a preference for longer chain lengths (**Fig. 4 b**). The  
227 same relative preferences were seen with LPC and LPE analyses. The rim samples showed significant  
228 enrichment in LPC(18:0) and LPE(18:0), while LPC(22:5) and LPE(22:5), as well as LPC(22:6) and  
229 LPE(22:6), were several-fold higher in the rhodopsin samples (**Fig. 4 c and d**). Cholesterol levels were  
230 found to be higher in rhodopsin samples when compared to the PRPH2/ROM1 samples, while ChE(18:2)  
231 was relatively enriched in the PRPH2/ROM1 samples relative to rhodopsin samples (**Fig. 4 e**).

### *Distinct membrane environments of ROS disks*

232 The common phospholipids also displayed multiple significant differences between the rim region  
233 and the center (**Table 1**), especially between PC and PE. There were many differences at the species level  
234 within each PL class as well (**Fig. 5**). There were some instances of differences in PE species between the  
235 samples of the two rim proteins, where rhodopsin and PRPH2/ROM1 were relatively higher in  
236 PE(16:0\_22:6) and PE(18:2\_22:6) when compared to ABCA4 (**Fig 5 a**). There were also significant  
237 differences among individual species in the phosphatidylinositol (PI) and PS classes (**Fig. 5 b and c**). Here,  
238 though, the rim samples ha similar profiles and were both distinct from rhodopsin samples, further  
239 confirming the similarity between the rim sample membranes.

240 We further evaluated the aggregate relationship between each sample using the unbiased method  
241 of principle component analysis (PCA) (**Fig. 6**). PCA was able to simplify the relationships between 199  
242 separate species across 14 lipid classes and found similarity between the rim samples and difference  
243 between the rim and the center region samples. Principle components 1 and 2 (PC1 and PC2, respectively)  
244 totaled a combined 64.16% of the variance in the system, with PC1 accounting for over 46%. The resultant  
245 PCA scores showed clustering of ABCA4 and PRPH2/ROM1 samples along both PC1 and PC2, far  
246 removed from rhodopsin along the PC1 axis. The rhodopsin samples grouped tightly, and associated more  
247 closely with the starting ROS samples with respect to PC1. Analysis of the PCA loadings suggested that  
248 PC1 found strongest differences in species across classes containing palmitic and stearic acid (16:0 and  
249 18:0, respectively) (corresponding to the rim samples) and chain lengths 20 or more containing 4-6  
250 unsaturated bonds (rhodopsin samples). We conclude that the lipid composition of the rim and center  
251 regions of ROS disks are distinct at the lipid species level.

#### ***Comparisons between the central and rim regions of ROS disks show differences in FA composition***

253 The PCA results suggested that FA chain length and/or unsaturation of the lipids residing in these  
254 two functionally distinct areas may be a key differentiator between their membranes. To address this fully,  
255 we performed lipid extractions from each SMALP-protein sample, then hydrolyzed the head groups of all  
256 lipid species in each sample, followed by FA lipidomic analysis *via* LC/MS. The FA compositions of the  
257 lipids isolated from the two rim-region proteins ABCA4 and PRPH2/ROM1 showed no statistically

## *Distinct membrane environments of ROS disks*

258 significant differences in relative molar percent for all chain lengths and saturations. There was considerable  
259 difference, however, in the FA composition of the rhodopsin-containing samples when compared to the rim  
260 proteins. The rim region proteins copurified with predominantly unsaturated and short chain length FAs,  
261 especially 16:0 and 18:0 (**Fig. 7 a**). Those two FA species accounted for over 67% relative to the entire FA  
262 content of the ABCA4 sample; and over 82% of the PRPH2/ROM1 sample. Conversely, the rhodopsin  
263 samples contained less than 30% of these two FAs.

264 Docosahexanoic acid (22:6, DHA) is known to be essential to ROS disk health, and DHA has been  
265 shown to facilitate rhodopsin activity (Bush et al., 1991; Organisciak et al., 1996; Litman et al., 2001). We  
266 found DHA was significantly higher in the central region than in the rim, with a DHA relative molar percent  
267 of 13.5% for rhodopsin samples (**Fig. 7 b**). The rhodopsin samples were enriched in LC-PUFAs more  
268 generally as well, whereas the rim samples contained only 1.6% or less molar percent LC-PUFAs.

269 Rhodopsin SMALPs also contained more VLC-PUFAs than those in the disk rim (**Fig. 7 c**). The  
270 most prominent VLC-PUFAs found in rhodopsin samples were dotriacontapentaenoic,  
271 dotriacontahexaenoic, tetratriacontapentaenoic, and tetratriacontahexaenoic acid (32:5, 32:6, 34:5, 34:6,  
272 respectively), with relative abundances between 0.6% - 1.3%. In contrast, the rim protein SMALPs were  
273 sparsely populated with VLC-PUFAs, accounting for 0.2% or less of their total FA content.

274

## 275 **DISCUSSION**

276 The first question to be answered by this study is whether lipids that copurify in SMALPs  
277 containing purified membrane proteins faithfully represent the native membrane regions from which they  
278 are purified. There have been reports that SMALPs composed of pure phospholipids of different types (*e.g.*,  
279 PC vs PE) rapidly exchange when incubated together, suggesting that native tissues, left solubilizing in  
280 SMA for 1-2 h, would result in an equilibrated distribution of membrane components among the protein-  
281 containing SMALPs (Cuevas Arenas et al., 2017; Schmidt and Sturgis, 2018; Danielczak and Keller, 2018).  
282 Prior work on single target proteins purified in SMALPs from membranes showed little difference between  
283 the mother membrane and the extracted, copurifying lipids (Dörr et al., 2014). Here, we document definitive

*Distinct membrane environments of ROS disks*

284 differences between samples isolated from different regions of the same mammalian membrane tissue,  
285 analogous to a recent report on bacterial membrane proteins (Teo et al., 2019). One explanation for the lack  
286 of predicted homogeneous mixing could be that the diverse membrane constituents of native membranes  
287 are organized into protein-dependent subdomains that are not susceptible to the fast exchange seen with  
288 pure phospholipid nanodiscs. Nevertheless, spontaneous lipid exchange is known to occur in biological  
289 membranes, so there is evidence in nature for membrane components to swap particular lipids in a manner  
290 that approaches equilibration (Bell, 1978). The bounded, roughly 12 nm-diameter SMALP disks may not  
291 behave like biological membranes, so ambiguity remained as to whether the lipid compositions in our study  
292 were the result of preferential sorting after extraction, or in fact represented the hyper-local membrane  
293 environments of the purified proteins.

294 To address the possibility of preferential sorting after extraction, we purified two proteins from the  
295 same rim region, ABCA4 and PRPH2/ROM1, and compared their lipid profiles with that of rhodopsin. We  
296 hypothesized that if the local lipid environment is preserved in SMALPs, then samples of the rim-region  
297 proteins should show similar lipid profiles to one another, distinct from that of rhodopsin samples. Our FA  
298 chain length/unsaturation analysis revealed no statistically significant differences between the two rim  
299 region samples; and indeed, there were clear differences between the FA arrays of the rhodopsin and rim  
300 samples. Furthermore, the cases of statistically significant differences between each rim sample and  
301 rhodopsin were nearly identical across all FA chain lengths and saturation levels. Therefore, this study  
302 provides strong evidence that SMA-extracted samples from native tissue are highly likely to retain the local  
303 environment from which they were isolated.

304 Rhodopsin is known to achieve a paracrystalline state in the central, flat portion of ROS disks, but  
305 it has also been found in the plasma membrane (Fotiadis et al., 2004; Kessler et al., 2014). We estimate that  
306 rhodopsin in the plasma membrane should account for less than 2% of total rhodopsin purified herein, given  
307 the calculated amount of rhodopsin in the plasma membrane of murine ROS is 2% (Kessler et al., 2014).  
308 The increased size of bovine ROS should decrease the relative amount of rhodopsin in the plasma  
309 membrane as the disk membranes scale in cumulative surface area more quickly than the plasma membrane

*Distinct membrane environments of ROS disks*

310 as dimensions increase. ABCA4 and PRPH2/ROM1, conversely, have been shown to localize on the rim  
311 region of the disks and have not been shown to exist in the plasma membrane in detectable amounts (Molday  
312 et al., 1987; Illing et al., 1997).

313 We approximated the amount of the ROS disk membrane accounted for by the SMALPs of our  
314 three chosen samples to assess the completeness of our analysis. We estimate 95% of the disk membranes  
315 are accounted for in the combined SMALPs of rhodopsin, ABCA4, and PRPH2/ROM1 (**Table 2**). We  
316 arrived at this estimation by finding the proportion of rhodopsin, ABCA4, PRPH2, and ROM1 in  
317 comparison with the other membrane components of ROS and comparing their theoretical numbers of  
318 copurifying lipids to get a weighted lipid contribution (WLC) for each protein (**Eq. 1**).

$$319 \quad (1) \text{WLC}_n = A_n \times \frac{(226 \text{ nm}^2 - (T_n \times 2.8 \text{ nm}^2))}{0.78 \text{ nm}^2}$$

320 We cross-referenced the nine membrane proteins classified as ROS disk-specific by Skiba et al. with the  
321 ROS disk proteomics reported by Kwok et al. using absolute protein expression (APEX) measurements  
322 taken by MS/MS (Skiba et al., 2013; Kwok et al., 2008). Each protein was normalized to their proportion  
323 of disk-specific membrane protein by dividing its APEX amount by the APEX amount for all disk-  
324 specific proteins combined ( $A_n$ , where n is a disk-specific protein, **Eq. 1**). These percentages were used to  
325 weight the theoretical number of lipids per SMALP for each protein. The theoretical number of lipids per  
326 SMALP for each protein was determined by subtracting the product of each protein's number of TM  
327 helices ( $T_n$ , **Eq. 1**) and twice the average cross-sectional area of a transmembrane alpha helix ( $\sim 1.4 \text{ nm}^2$ )  
328 from the theoretical total surface area of a 12 nm diameter SMALP ( $\sim 113 \text{ nm}^2$  per side of disk) (**Fig. S1 i**)  
329 (Eskandari et al., 1998; Swainsbury et al., 2014; Takamori et al., 2006). This number gave the free area  
330 for lipids in each SMALP, and an estimate of the number of lipids was calculated by dividing by the  
331 average cross-sectional area of a phospholipid ( $\sim 0.78 \text{ nm}^2$ ) (Lee, 2003). Each of the disk-specific  
332 membrane proteins' average number of phospholipids per SMALP was then weighted by  $A_n$ , resulting in  
333 the WLC of each protein.  $\text{WLC}_{\text{rhodopsin}}$ ,  $\text{WLC}_{\text{ABCA4}}$ , and  $\text{WLC}_{\text{PRPH2/ROM1}}$  were added together and divided

*Distinct membrane environments of ROS disks*

334 by the sum of all WLCs, giving an approximate lipid contribution of 95% from the three samples studied  
335 here (**Eq. 2**).

$$336 \quad (2) \text{ WLC}_{\text{rho,ABCA4,PRPH2/ROM1}} = \frac{\text{WLC}_{\text{rhodopsin}} + \text{WLC}_{\text{ABCA4}} + \text{WLC}_{\text{PRPH2/ROM1}}}{\sum_n \text{WLC}_n}$$

337 This estimation gives us confidence that we have studied the majority of the disk membranes.

338 The stark contrast in the profiles of FA chain lengths between the rim and center of the disks is  
339 remarkable (**Fig. 7**). The center of the disk is enriched with LC- and VLC-PUFAs relative to the disk rim.  
340 The relative abundance of DHA coincident with rhodopsin is consistent with the well-documented  
341 requirement of DHA for healthy rhodopsin activity (Mitchell et al., 1992b). The relative abundance of  
342 eicosatetraenoyl acid (arachidonic acid (AA), 20:4) in the disk center is consistent with its well-known role  
343 as a critical precursor for LC- and VLC-PUFAs (Grogan and Lam, 1982; Grogan and Huth, 1983; Grogan,  
344 1984).

345 On a more general scale, the rhodopsin samples showed that combined VLC-PUFAs represent over  
346 15% of total FAs in the center of bovine ROS disks, roughly equivalent to the 13% of whole bovine ROS  
347 reported by Aveldaño and Sprecher (using their classification of VLC-PUFA as  $\geq 24$  carbons in length)  
348 (Aveldaño and Sprecher, 1987). A particularly intriguing finding was the distinct lack of VLC-PUFAs in  
349 the rim region. We had surmised that the slightly wider and curving rim region might provide more space  
350 for the extended acyl chains of VLC-PUFAs, but we now deduce that the rim region membranes require  
351 the stiffness provided by the abundant 16:0 and 18:0 saturated chains found there.

352 We were struck by the panoply of components extracted by SMALPs and measured by the  
353 lipidomic analysis of the ROS. Many membrane components copurified with the sample proteins, including  
354 lyso-PLs, sterols, sphingolipids, AcCa, FFA, cardiolipin, and mono/di/triglycerides. This comprehensive  
355 report (**Figs. 4 and 5, Fig. S2-5**) of the components of the ROS disk membranes is, to our knowledge, the  
356 most complete of any tissue extracted by native nanodiscs (*e.g.*, SMALPs). The results of our PCA confirm,  
357 in an unbiased manner, that many of the diverse components found in this study are spread anisometrically  
358 across the continuous ROS disk membrane, favoring the center or rim region (**Fig 6**). Some of this

*Distinct membrane environments of ROS disks*

359 systematic heterogeneity is likely critical to the maintenance of healthy phototransduction and should be  
360 probed more deeply. This data also begs the question of how the asymmetry is initiated and maintained by  
361 ROS membrane proteins.

362 Differences in content of acyl-carnitine and lyso-PLs are the most notable in the analysis of the  
363 lipid classes. While carnitine has been reported to be in ocular tissues, our data further localize at least some  
364 of the acyl-carnitine to the center of the ROS disks (**Fig. 4 a**) (Pessotto et al., 1994). Previous work has  
365 shown that injection of carnitine in the eye can be protective in a methylcellulose-induced ocular  
366 hypertension model, as measured by decreased levels of inducible nitrogen oxide synthase (iNOS),  
367 malondialdehyde (MDA), and ubiquitin (Ub) (Calandrella et al., 2010). Our results, which place AcCa in  
368 the immediate vicinity of rhodopsin in the membrane, suggest that carnitine may act as a check on normal  
369 oxidative stress in the OS disk membranes. Supplemental carnitine could increase the protective effect  
370 afforded the retina by endogenous levels of carnitine in the OS disks, but more evidence is needed to  
371 confirm this.

372 The presence of lyso-PLs has been reported at the tissue level in bovine and human retinas, but  
373 their specific function(s) in the retina are yet to be determined (Berdeaux et al., 2010). As a surfactant, lyso-  
374 PC has been shown to increase membrane fluidity, which is itself important for protein reorganization in  
375 OS disks (Henriksen et al., 2010; Rakshit et al., 2017). Our data show unequivocal differentiation of the  
376 lyso-PLs, with short, saturated species on the rim and LC-PUFAs in the center (**Fig. 4 c and d**). Lyso-PLs  
377 consisting of LC-PUFAs likely contribute even more fluidity to the center of the disk. In addition to this  
378 general effect, it is conceivable that the lyso-PLs in the center of ROS disks interact specifically with the  
379 membrane proteins in a signaling capacity. Lyso-PLs have been shown to interact with GPCRs to initiate  
380  $G_{12/13}$ ,  $G_{q/11}$ ,  $G_i$  and  $G_s$  signaling, thereby affecting various downstream, intracellular signaling pathways  
381 (Anliker and Chun, 2004; Xiang et al., 2013; Torkhovskaya et al., 2007; Li et al., 2016). Rhodopsin is  
382 already known to be affected by the membrane composition when transitioning between the Meta I and  
383 Meta II states (Gibson and Brown, 1991a; b, 1993; Botelho et al., 2002), but more study is needed to probe  
384 the possibility of alternative G protein interactions with rhodopsin for the propagation of lyso-PL signals.



*Distinct membrane environments of ROS disks*

385           The trend indicating enrichment of free cholesterol toward the center of the disks was surprising  
386 (**Fig. 4 e**). Past theories suggested that an exchange of disk cholesterol with the PM causes a gradient of  
387 cholesterol from high (nascent disks) to low (mature disks). Therefore, we had expected to see a relative  
388 increase in free cholesterol in the rim of the disk (Boesze-Battaglia et al., 1989). One way to explain our  
389 result is that the rim, with its highly curved structure, cannot maintain high levels of cholesterol. There may  
390 be a separate route for cholesterol movement between disks that allows for the diminution of free cholesterol  
391 in maturing disks, but this is only speculation. Regardless, all samples isolated from the disks showed lower  
392 relative levels of free cholesterol than the ROS starting material, which contained both disks and PM.

393           This study, to our knowledge, is the first to extract and purify mammalian membrane proteins along  
394 with their corresponding native membrane environment. We were able to document the precise, species-  
395 level differences between the two lipid domains of ROS disks (**Fig. 8**). Our results could provide more  
396 context for prior work done on detergent-resistant membranes (DRMs) of the ROS, where Triton X-100-  
397 resistant membranes low in rhodopsin and seemingly high in ABCA4 were isolated from the rest of ROS  
398 disks (Martin et al., 2005). The DRMs were shown to have some of the same trends between DRM and  
399 fully-solubilized regions as seen between the rim and center regions in this work.

400           Further work should be dedicated to studying physiological protein-lipid interactions of the retina,  
401 as many of the key proteins in the visual cycle and phototransduction are membrane proteins. To this end,  
402 the process of studying differential membrane composition based on native protein isolation in SMALPs  
403 should be expanded to other systems in the hope of uncovering detailed information on the preferred lipid  
404 environment of other membrane proteins. In particular, the use of high-resolution lipidomics may help  
405 explain pathologies involving critical protein-lipid interactions.

406

## 407 **EXPERIMENTAL PROCEDURES**

### 408 **Animals**

409 All animal protocols were approved by the Institutional Animal Care and Use Committees at the University  
410 of California, Irvine and were conducted in accordance with the Association for Research in Vision and

*Distinct membrane environments of ROS disks*

411 Ophthalmology (ARVO) *Statement for the Use of Animals in Ophthalmic and Visual Research*. Wild-type  
412 (WT) and *Abca4<sup>-/-</sup>Rdh8<sup>-/-</sup>* mice on a BALB/cJ background were used in this study. All mice were housed in  
413 the University Laboratory Animal Resources (ULAR) facilities at the University of California, Irvine and  
414 maintained in a 12 h/12 h light-dark cycle, and fed Teklad global soy protein-free extruded rodent diet  
415 (Envigo, Indianapolis, IN) chow and water *ad libitum*.

416 **Extraction of ROS proteins in SMA**

417 Detergent (laurel maltose neopentyl glycol (LMNG)) (Anatrace, Maumee, OH) or XIRAN  
418 SL30010 P20 (Polyscope Polymers B.V., Netherlands) SMA (2.3:1 styrene:maleic acid ratio) were  
419 incubated at varying concentrations for 1 h with ROS obtained from 3-4 bovine retinas in 1 mL of Extraction  
420 Buffer (20 mM BTP, pH 7.9, 10% glycerol, 300 mM NaCl, 1 mM TCEP). The incubations with SMA were  
421 conducted at RT, and with detergent at 4 °C. All samples were centrifuged at 100,000g for 1 h, and the  
422 soluble fractions were separated. Each pellet was resuspended in 10% SDS-containing Wash Buffer. Ten  
423 µl were loaded for each sample onto a Mini-PROTEAN TGX precast gel, 4-20% gradient (Bio-Rad,  
424 Hercules, California), and in the case of immunoblot analysis, proteins were transferred to a PVDF  
425 membrane. After blocking for 1 h in 5% (w/v) non-fat dry milk, anti-ABCA4 primary antibody TMR4 was  
426 added at 1:1,000 dilution from a 1 mg/mL stock, and incubated with the membrane overnight at 4 °C.  
427 Membranes were washed with PBST and then anti-mouse IgG (H&L) alkaline phosphatase-conjugated  
428 secondary antibody (Promega) was incubated with the membrane at a 1:5,000 dilution for 1 h at RT. After  
429 the membranes were again washed with PBST, the blots were developed with Western Blue® Stabilized  
430 Substrate for Alkaline Phosphatase (Promega, Madison, WI) for roughly 15 sec, then quenched with  
431 ultrapure water.

432 **Immunoblotting of bovine ABCA4**

433 ROS of 50 bovine retinas were isolated as described previously and suspended in Extraction Buffer (20  
434 mM BTP, pH 7.9, 10% glycerol, 300 mM NaCl, 1 mM TCEP) containing 2% LMNG (Anatrace)  
435 (Papermaster, 1982). The soluble fraction was separated from insoluble material by centrifugation at  
436 100,000g for 1 h at 4 °C. A 10 µL aliquot of the soluble fraction was loaded into each lane of a Mini-

### *Distinct membrane environments of ROS disks*

437 PROTEAN TGX precast gel, 4-20% gradient (Bio-Rad,); and then proteins were transferred to PVDF  
438 membranes. After blocking for 1 h in 5% (w/v) non-fat dry milk, primary antibodies against ABCA4,  
439 namely CL2, Rim3F4, and TMR4 (Zhang et al., 2015) were added at dilutions of 1:10,000 from 1 mg/mL  
440 stocks, and incubated overnight at 4 °C. Membranes were washed with PBS containing 0.1% (v/v) Tween  
441 20 (PBST), and then anti-mouse IgG (H&L) alkaline phosphatase-conjugated secondary antibodies  
442 (Promega) were incubated with the blots at a dilution of 1:5,000 for 1 h at room temperature (RT). After  
443 washing with PBST, blots were developed with Western Blue Stabilized Substrate for Alkaline Phosphatase  
444 (Promega) and imaged using an Odyssey Fc imager (LI-COR, Lincoln, NE), using the 700 nm channel with  
445 a 2-min exposure time.

#### **446 Immunoblot of Murine Retinas**

447 Murine samples were obtained from the enucleated eyes of WT and *Abca4<sup>-/-</sup>Rdh8<sup>-/-</sup>* mice according to a  
448 previously published protocol (Wei et al., 2016). Protein concentrations were determined with a BCA Assay  
449 kit (Bio-Rad), following the manufacturer's instructions. Protein samples were mixed with NuPAGE LDS  
450 sample buffer and NuPAGE reducing agent, separated using NuPAGE 4-12% Bis-Tris gels (Invitrogen,  
451 Carlsbad, CA), and transferred to PVDF membranes. Membranes were blocked with 5% (w/v) non-fat dry  
452 milk and incubated with the CL2 antibody overnight at 4 °C. After washing with PBST, membranes were  
453 incubated with peroxidase-linked anti-mouse or anti-rabbit IgG (1:10,000) (Jackson ImmunoResearch  
454 Laboratories, West Grove, PA) for 1 h at room temperature. Protein bands were visualized after exposure  
455 to SuperSignal West Pico Chemiluminescent substrate (ThermoFisher Scientific, Waltham, MA).

#### **456 Immunohistochemistry of retinal sections**

457 Mouse eye cups were fixed for 1 h in PBS containing 4% (w/v) paraformaldehyde (Sigma-Aldrich)  
458 at room temperature. After fixation, the eye cups were incubated sequentially in PBS containing 10, 20 or  
459 30% (w/v) sucrose (Sigma-Aldrich, St. Louis, MO) for 30 min at room temperature. Then, the eye cups  
460 were infiltrated with a 2:1 mixture of PBS containing 30% sucrose and OCT compound (VWR  
461 International, Radnor, PA) and frozen with dry ice. Retinal sections were cut at a thickness of 12 µm and  
462 stored at -80 °C until use. The retinal sections were rehydrated with PBS and blocked with PBS containing

*Distinct membrane environments of ROS disks*

463 5% (v/v) goat serum (Thermo Fisher Scientific) and 0.1% (v/v) TritonX-100 (Sigma-Aldrich). After  
464 blocking, the sections were incubated with the appropriate primary antibodies diluted in PBS containing  
465 5% goat serum overnight at 4 °C. Primary antibodies used for immunohistochemistry were Rim3F4, TMR4,  
466 and CL2. The retinal sections were washed with PBS three times for 5 min each and then incubated with  
467 Alexa Fluor 488-conjugated goat anti-mouse immunoglobulin G (IgG) diluted in PBS containing 5% goat  
468 serum at 1:400. After incubation, the retinal sections were washed with PBS three times for 5 min each and  
469 then mounted with Vectashield Mounting Medium (Vector Laboratories, Burlingame, CA). The images  
470 were acquired with a BZ-X810 Keyence microscope (Keyence, Itasca, IL) at 20X with numerical aperture  
471 of 0.75 at RT with no imaging medium and Alexa Fluor 488 used as the fluorochrome. The camera was  
472 built into the BZ-X810 Keyence microscope, and BZ-X800 viewer from Keyence was the acquisition  
473 software. Adobe Photoshop was used to adjust the orientations and Adobe Illustrator to make the figure.

474 **Purification of native, bovine ABCA4 in SMA**

475 ROS isolated from 50 bovine retinas were extracted in 16 mL of Extraction Buffer with 2.5% SMA  
476 (v/v) (XIRAN SL30010 P20) (Polyscope Polymers B.V.) for 1 h at 4 °C in the dark, followed by  
477 centrifugation at 100,000g for 1 h at 4 °C. 1 mL of ~8.0 mg/mL fresh immunoaffinity resin was prepared  
478 by conjugating purified, anti-ABCA4 antibody (CL2) to CNBr-activated Sepharose 4B beads (GE  
479 Healthcare Bio-Sciences, Chicago, IL, USA) according to manufacturer's instructions. The extracted  
480 fraction of ROS was then mixed with the immunoaffinity resin, brought to 168 mM NaCl through dilution  
481 with SMA Wash Buffer (20 mM BTP, pH 7.9, 10% glycerol, 35 mM NaCl, 1 mM TCEP) and incubated  
482 for 6 h. The flow-through was collected and used to purify rhodopsin or PRPH2/ROM1. After washing the  
483 column with 15 mL of SMA Wash Buffer, two successive 15 mL washes with High Salt SMA Wash Buffer  
484 (20 mM BTP, pH 7.9, 10% glycerol, 500 mM NaCl, 1 mM TCEP) were passed over the column, followed  
485 by a 15 mL wash with SMA Wash Buffer. Elution Buffer was made by adding 40 mg/mL of CL2 peptide  
486 (NETYDLPLHPRTAGASRQAKEVDKGC) to 1 mL of Wash Buffer. After the elution step, the column  
487 was washed with 1 mL of SMA Wash Buffer, and then all proteins remaining on the resin were eluted with  
488 1 column volume of 10% SDS. Each lane of the corresponding SDS-PAGE gel represents 10 µL of sample

*Distinct membrane environments of ROS disks*

489 at the concentration of the sample, not adjusted to constant protein concentration across lanes.

490 Immunoaffinity Elution and Elution Wash fractions of ABCA4 were pooled and concentrated to  
491 0.5 mL and then centrifuged at 20,000g for 10 min. The soluble fraction was then injected onto a Superdex  
492 200 Increase 10/300 GL (GE Healthcare Bio-Sciences) size exclusion chromatography (SEC) column to  
493 remove rhodopsin. SMA SEC Buffer (20 mM BTP, pH 7.9, 10 mM NaCl, 1 mM TCEP) was used as the  
494 mobile phase, and fractions containing ABCA4 were pooled for use in other experiments.

495 **Establishing Nb for PRPH2/ROM1 isolation**

496 Washed ROS membranes from 50 frozen bovine retinas were thawed on ice and re-suspended in a  
497 detergent-based solubilization buffer (20 mM BTP, pH 7.9, 300 mM NaCl, 2.5 mM DTT, 25 mM DDM)  
498 and incubated at 4 °C for 1 h with end over end mixing. To prevent reactions between free cysteine residues,  
499 the crude protein lysate was treated with 5.0 mM iodoacetamide for 30 min at room temperature. The  
500 solution was then quenched with an additional 5 mM DTT and immediately centrifuged at 150,000 × g for  
501 1 h at 4 °C to clear insoluble material and aggregated proteins, the sample then was incubated for 1 h at 4  
502 °C with end over end mixing with nanobodies Nb20, Nb19, Nb28, Nb32, Nb13 to a final ratio of  
503 PRPH2/ROM1:Nb of 1:2. 1.0 mL of pre-equilibrated cComplete Ni<sup>2+</sup>-resin (Sigma-Aldrich) was added to  
504 the solution and incubated for 1 h at 4 °C with end-over-end mixing. The resultant suspension was  
505 transferred to a 5.0 mL gravity column. The resin was washed with 10 column volumes of 20 mM BTP, pH  
506 7.9, 300 mM NaCl, 0.35 mM DDM, 1.0 mM imidazole. Each PRPH2/ROM1/Nb complex was eluted with  
507 four column volumes elution buffer, comprised of the same wash buffer but with a final imidazole  
508 concentration of 300 mM. Aliquots of all samples along the stages of purification were saved for analysis.  
509 The resulting elution was then concentrated, and buffer exchanged to 20 mM BTP pH 7.9, 300 mM NaCl,  
510 0.35 mM DDM using a PD-10 column (GE Healthcare Bio-Sciences). The sample was concentrated to 1.0  
511 mg/mL, frozen in liquid nitrogen, and stored at -80 °C for future use.

512 **Purification of native, bovine PRPH2/ROM1 in SMA**

513 ROS isolated from 50 bovine retinas were thawed on ice and re-suspended in Extraction Buffer  
514 with 2.5% SMA (v/v) (XIRAN SL30010 P20) (Polyscope Polymers B.V.) and incubated at 4 °C for 1 h

*Distinct membrane environments of ROS disks*

515 with end-over-end mixing. To prevent reactions between free cysteine residues, the crude protein lysate  
516 was treated with 5.0 mM iodoacetamide for 30 min at room temperature. The solution was then quenched  
517 with an additional 5 mM DTT and immediately centrifuged at  $150,000 \times g$  for 1 h at 4 °C to clear insoluble  
518 material and aggregated proteins. The sample then was incubated for 1 h at 4 °C with end-over-end mixing  
519 with PRPH2/ROM1-specific nanobody Nb19 to a final ratio of PRPH2/ROM1:Nb19 at 1:2 (Nb19 includes  
520 His6 tag). 1.0 mL of pre-equilibrated cComplete Ni<sup>2+</sup>-resin (Sigma-Aldrich) was added to the solution and  
521 incubated for 1 h at 4 °C with end-over-end mixing. The resultant suspension was transferred to a 5.0 mL  
522 gravity column. The resin was washed with 10 column volumes of 20 mM BTP, pH 7.9, 300 mM NaCl,  
523 and 1.0 mM imidazole. The Prph2/ROM1/Nb19 complex was eluted with four column volumes of elution  
524 buffer, comprised of the same wash buffer but with a final imidazole concentration of 300 mM. Aliquots  
525 of all samples along the stages of the purification were saved for analysis. The resulting elution was then  
526 concentrated, and buffer exchanged to 20 mM BTP pH 7.9, 300 mM NaCl using a PD-10 column (GE  
527 Healthcare). The sample was concentrated to 1.0 mg/mL, frozen in liquid nitrogen, and stored at -80 °C for  
528 future use.

529 **Purification of native, bovine rhodopsin in SMA**

530 ROS isolated from 50 bovine retinas were extracted in 16 mL of Extraction Buffer with 2.5% SMA  
531 (v/v) (XIRAN SL30010 P20) (Polyscope Polymers B.V.) for 1 h at 4 °C in the dark, followed by  
532 centrifugation at 100,000g for 1 h at 4 °C. 1 mL of ~8.0 mg/mL fresh immunoaffinity resin was prepared  
533 by conjugating purified, anti-rhodopsin antibody (1D4) to CNBr-activated Sepharose 4B beads (GE  
534 Healthcare Bio-Sciences) according to manufacturer's instructions (Molday and Molday, 2014). The  
535 extracted fraction of ROS was then mixed with the immunoaffinity resin, brought to 168 mM NaCl through  
536 dilution with SMA Wash Buffer (20 mM BTP, pH 7.9, 10% glycerol, 35 mM NaCl, 1 mM TCEP) and  
537 incubated for 6 h. The flow-through was collected and used to purify PRPH2/ROM1. After washing the  
538 column with 15 mL of SMA Wash Buffer, two successive 15 mL washes with High Salt SMA Wash Buffer  
539 (20 mM BTP, pH 7.9, 10% glycerol, 500 mM NaCl, 1 mM TCEP) were passed over the column, followed  
540 by a 15 mL wash with SMA Wash Buffer. Elution Buffer was made by adding 40 mg/mL of 1D4 peptide

## *Distinct membrane environments of ROS disks*

541 (TETSQVAPA) to 1 mL of Wash Buffer (Molday and Molday, 2014). After the elution step, the column  
542 was washed with 1 mL of SMA Wash Buffer, and then all proteins remaining on the resin were eluted with  
543 1 column volume of 10% SDS. Each lane of the corresponding SDS-PAGE gel represents 10  $\mu$ L of sample  
544 at the concentration of the sample, not adjusted to constant protein concentration across lanes.

### **Transmission electron microscopy**

546 Four  $\mu$ L of the peak SEC fractions containing ABCA4 were adsorbed for 1 min to carbon coated,  
547 glow-discharged grids (15 mA for 15 sec) (Electron Microscopy Sciences, Hatfield, PA). The grids were  
548 washed with two 20  $\mu$ L drops of ultrapure water and then stained with two 20  $\mu$ L drops of 1% (w/v) uranyl  
549 acetate (Electron Microscopy Sciences); the first for 10 sec and the second for 1 min. Data were collected  
550 with a JEOL JEM-2200fs microscope (JEOL, Japan), operated at 200 kV and equipped with a Tietz TVIPS  
551 CCD Camera at 60,000x magnification. The pixel size was 2.131  $\text{\AA}$ .

### **Single particle reconstruction**

553 *De novo* particle reconstruction of SMALP-embedded ABCA4 was done using the program  
554 cisTEM, following a published workflow (Grant et al., 2018). cisTEM auto-picked 71,088 particles that  
555 were then sorted by 2D classification into good classes containing 14,652 particles. The particles contained  
556 in these classes were then used for cisTEM's *ab initio* 3D structure generation, which was then refined  
557 using cisTEM's Auto Refine. Further structural analysis of ABCA4 was done in UCSF Chimera (Pettersen  
558 et al., 2004).

### **Trp fluorescence quenching assay**

560 All measurements were performed on a PerkinElmer Life Sciences LS55 model fluorometer  
561 (PerkinElmer, Waltham, MA). Binding of ATP to purified ABCA4 in SMALPs was evaluated by  
562 monitoring the quenching of protein fluorescence at increasing concentrations of ATP (0-1.5 mM). With  
563 the excitation wavelength set at 290 nm, emission spectra were recorded at 330 nm over 1 min with 2 sec  
564 intervals with bandwidths for excitation and emission fixed at 10 nm. Titrations were carried out at 20  $^{\circ}$ C  
565 in 20mM BTP buffer, pH 7.9, containing 35 mM NaCl and 1 mM TCEP. ATP stock solution was diluted  
566 in ultrapure water. All binding data were corrected for background and self-absorption of excitation and



*Distinct membrane environments of ROS disks*

567 emission light using a Varian Cary 50 Bio UV-Visible Spectrophotometer (Palo Alto, CA).

568 **Rhodopsin absorption assay**

569 All measurements were performed on a Varian Cary 50 Bio UV-Visible Spectrophotometer.  
570 Rhodopsin purified in the dark in SMALPs was measured by absorption from 250-600 nm. The sample was  
571 then incubated with hydroxylamine to a final concentration of 8 mM and allowed to bleach completely in  
572 light for 7 min, after which the absorption spectrum was taken. The sample was regenerated with 9-cis  
573 retinal added to a final concentration of 70  $\mu$ M and allowed to regenerate over 20 min, overnight, and for  
574 two days, with the spectrum taken at each time point.

575 **Lipid extraction and untargeted lipidomics**

576 Lipids were extracted using a modified version of the Bligh-Dyer method (Bligh and Dyer, 1959).  
577 Briefly, samples were shaken in a glass vial (VWR) with 1 mL PBS, 1 mL methanol and 2 mL chloroform  
578 containing internal standards ( $^{13}\text{C}_{16}$  palmitic acid,  $^2\text{H}_7$  cholesterol) for 30 sec. The resulting mixture was  
579 vortexed for 15 sec and centrifuged at 2400g for 6 min to achieve phase separation. The organic (bottom)  
580 layer was retrieved using a Pasteur pipette, dried under a gentle stream of nitrogen, and reconstituted in 2:1  
581 chloroform:methanol for LC/MS analysis.

582 Lipidomic analysis was performed on a Vanquish HPLC online with a Q-Exactive quadrupole-  
583 orbitrap mass spectrometer equipped with an electrospray ion source (Thermo). Data was acquired in  
584 positive and negative ionization modes. Solvent A consisted of 95:5 water:methanol, Solvent B was 70:25:5  
585 isopropanol:methanol:water. For positive mode, solvents A and B contained 5 mM ammonium formate  
586 with 0.1% formic acid; for negative mode, solvents contained 0.028% ammonium hydroxide. An XBridge  
587 (Waters) C8 column (5  $\mu$ m, 4.6 mm  $\times$  50 mm) was used. The gradient was held at 0% B between 0 and 5  
588 min, raised to 20% B at 5.1 min, increased linearly from 20% to 100% B between 5.1 and 55 min, held at  
589 100% B between 55 min and 63 min, returned to 0% B at 63.1 min, and held at 0% B until 70 min. Flow  
590 rate was 0.1 mL/min from 0 to 5 min, 0.3 mL/min between 5.1 min and 55 min, and 0.4 mL/min between  
591 55 min and 70 min. Spray voltage was 3.5 kV and 2.5 kV for positive and negative ionization modes,  
592 respectively; S-lens RF level was 65. Sheath, auxiliary, and sweep gases were 50, 10 and 1, respectively.

### *Distinct membrane environments of ROS disks*

593 Capillary temperature was 325 °C and auxiliary gas heater temperature was 200 °C. Data were collected in  
594 full MS/dd-MS2 (top 10). Full MS was acquired from 150–1500 m/z with resolution of 70,000, AGC target  
595 of  $1 \times 10^6$  and a maximum injection time of 100 ms. MS2 was acquired with resolution of 17,500, a fixed  
596 first mass of 50 m/z, AGC target of  $1 \times 10^5$  and a maximum injection time of 200 ms. Stepped normalized  
597 collision energies were 20, 30 and 40%.

#### 598 **Lipid extraction and FA lipidomic analysis**

599 For lipid hydrolysis, extracted lipids were resuspended in 200  $\mu$ L of ethanol, incubated with 0.1 M  
600 KOH at room temperature for 24 h for saponification. The reaction was stopped by addition of 0.2 M HCl.  
601 Lipids were extracted as described above with  $^2\text{H}_{31}$  palmitic acid as internal standard.

602 FA lipidomic analysis was performed on a Dionex Ultimate 3000 LC system (Thermo) coupled to  
603 a TSQ Quantiva mass spectrometer (Thermo). Solvent A consisted of 95:5 water:methanol, Solvent B was  
604 70:25:5 isopropanol:methanol:water. For negative mode, solvents contained 0.028% ammonium  
605 hydroxide. An XBridge C8 column (Waters, Milford, MA) (5  $\mu$ m, 4.6 mm  $\times$  50 mm) was used. The gradient  
606 was as described under “**Lipid extraction and untargeted lipidomics**” (above). MS analyses were  
607 performed using electrospray ionization in negative ion mode, with spray voltages of -2.5 kV, ion transfer  
608 tube temperature of 325 °C, and vaporizer temperature of 200 °C. Sheath, auxiliary, and sweep gases were  
609 40, 10 and 1, respectively. Pseudo-MRM was performed for all fatty acids.

#### 610 **Lipid data analysis**

611 Lipid identification was performed with LipidSearch (Thermo). Mass accuracy, chromatography  
612 and peak integration of all LipidSearch-identified lipids and targeted lipids were verified with Skyline  
613 (MacLean et al., 2010). Peak areas were used in data reporting, and data were normalized using internal  
614 standards. Quantification of the FFAs was performed by measuring the area under the peak, and the “raw”  
615 value is reported as relative molar percentage of total area under the curve for each sample. In cases of two  
616 peaks for a single species (*e.g.*, the result of omega-3 vs omega-6 differences in FA), we added the peak  
617 areas together and reported the species without omega-3/6 differentiation. Each lipid class was then  
618 normalized separately such that the sum of all species of a class equaled 100%. These relative molar

*Distinct membrane environments of ROS disks*

619 percentages were used for all graphs and analysis. In cases of less than 3 samples for a particular species,  
620 the species was excluded from all ANOVA analysis. All lipid species found across all samples were used  
621 for PCA (199 total species, 14 classes). PCA scores, loadings, and variances were calculated using  
622 Graphpad Prism software (Graphpad, San Diego, CA).

623

624 **SUPPLEMENTAL MATERIAL**

625 **Fig. S1** shows SMA extraction of ROS, characterization of anti-ABCA4 mAb CL2 with murine and bovine  
626 samples, and nsTEM analysis showing ABCA4 purified with CL2 in SMA shows increased TMD density.  
627 **Fig. S2-5** show the full list of lipid species detected, with each species amount graphed as the percent of  
628 the total for each particular class (PC, PE, etc.).

629

630 **ACKNOWLEDGEMENTS**

631 We would like to thank David Peck, Tim Dinh, and Huajun Yan for isolation of the bovine retinas. We  
632 would also like to thank Brian Kevany for help with the initial nanobody expression and screening The CL2  
633 antibody was produced by Denice Major, Visual Science Research Core of Case Western Reserve  
634 University, supported by P30 EY11373. This research was supported in part by grants to K.P. from the  
635 National Institutes of Health (NIH) (EY009339, EY027283, EY030873, and EY019312) and to P.D.K.  
636 from the U.S. Department of Veterans Affairs (I01BX004939). C.L.S. was supported by NEI-funded  
637 predoctoral fellowships T32EY007157-17 and T32EY007157-16A1. E.H.C. was supported by predoctoral  
638 fellowships T32GM007250 and T32GM008803. S.S. was supported by predoctoral fellowships  
639 F30EY029136-01A1, T32EY024236, and T32GM007250. The authors also acknowledge support from an  
640 RPB unrestricted grant to the Department of Ophthalmology, University of California, Irvine. This work  
641 was also supported by the Mass Spectrometry Core of the Salk Institute with funding from NIH-NCI CCSG:  
642 P30 014195 and the Helmsley Center for Genomic Medicine. The MS data described here were gathered  
643 on a ThermoFisher Q Exactive Hybrid Quadrupole Orbitrap mass spectrometer funded by NIH grant  
644 (1S10OD021815-01). Molecular graphics and analyses were performed with UCSF Chimera, developed

*Distinct membrane environments of ROS disks*

645 by the Resource for Biocomputing, Visualization, and Informatics at the University of California, San  
646 Francisco, with support from NIH P41-GM103311. C.L.S., H.J., and K.P. have filed for a patent on the  
647 CL2 monoclonal antibody; they declare no additional conflict of interest. All other authors report no  
648 conflicts of interest.

649

650 **AUTHOR CONTRIBUTIONS**

651 Christopher L. Sander helped design the antigen for the CL2 mAB; designed, performed, and/or analyzed  
652 the results of all experiments; and wrote and revised the manuscript. Avery E. Sears developed the Nb19  
653 nanobody and the purification of PRPH2/ROM1 and helped write and revise the manuscript. Antonino M.  
654 Pinto and Alan Saghatelian helped design and carried out the lipidomic data collection and performed initial  
655 data analysis. Elliot H. Choi performed IHC of murine samples and revised the manuscript. Shirin  
656 Kahremany helped design and perform rhodopsin regeneration experiments and revised the manuscript.  
657 Susie Suh performed immunoblots of murine samples and revised the manuscript. Hui Jin helped design  
658 the antigen for the CL2 mAB and revised the manuscript. Els Pardon and Jan Steyaert developed and  
659 provided the original Nb families for screening against PRPH2/ROM1 and helped edit the manuscript.  
660 Zhiqian Dong provided mouse retina cryosections. Dorota Skowronska-Krawczyk helped design the  
661 lipidomic experiments and revised the manuscript. Philip D. Kiser helped design all experiments and  
662 revised the manuscript. Krzysztof Palczewski helped design the antigen for the CL2 mAb, helped design  
663 all experiments, and revised the manuscript.

664

665

666

667

668

669

670

671 **REFERENCES**

- 672 Ahn, J., J.T. Wong, and R.S. Molday. 2000. The Effect of Lipid Environment and Retinoids on  
673 the ATPase Activity of ABCR, the Photoreceptor ABC Transporter Responsible for  
674 Stargardt Macular Dystrophy. *J. Biol. Chem.* 272:20399–20405.  
675 doi:10.1074/jbc.M000555200.
- 676 Anliker, B., and J. Chun. 2004. Lysophospholipid G protein-coupled receptors. *J. Biol. Chem.*  
677 279:20555–20558. doi:10.1074/jbc.R400013200.
- 678 Aveldaño, M.I., and H. Sprecher. 1987. Very long chain (C24 to C36) polyenoic fatty acids of the  
679 n-3 and n-6 series in dipolyunsaturated phosphatidylcholines from bovine retina. *J. Biol.*  
680 *Chem.* 262:1180–1186.
- 681 Bada Juarez, J.F., J.C. Muñoz-García, R. Inácio dos Reis, A. Henry, D. McMillan, M. Kriek, M.  
682 Wood, C. Vandenplas, Z. Sands, L. Castro, R. Taylor, and A. Watts. 2020. Detergent-free  
683 extraction of a functional low-expressing GPCR from a human cell line. *Biochim. Biophys.*  
684 *Acta BBA - Biomembr.* 1862:183152. doi:10.1016/j.bbamem.2019.183152.
- 685 Bell, F.P. 1978. Lipid exchange and transfer between biological lipid-protein structures. *Prog.*  
686 *Lipid Res.* 17:207–243. doi:10.1016/0079-6832(78)90008-3.
- 687 Berdeaux, O., P. Juaneda, L. Martine, S. Cabaret, L. Bretillon, and N. Acar. 2010. Identification  
688 and quantification of phosphatidylcholines containing very-long-chain polyunsaturated  
689 fatty acid in bovine and human retina using liquid chromatography/tandem mass  
690 spectrometry. *J. Chromatogr. A.* 1217:7738–7748. doi:10.1016/j.chroma.2010.10.039.

*Distinct membrane environments of ROS disks*

- 691 Bernstein, P.S., J. Tammur, N. Singh, A. Hutchinson, M. Dixon, C.M. Pappas, N.A. Zabriskie, K.  
692 Zhang, K. Petrukhin, M. Leppert, and R. Allikmets. 2001. Diverse Macular Dystrophy  
693 Phenotype Caused by a Novel Complex Mutation in the ELOVL4 Gene. *Invest.*  
694 *Ophthalmol. Vis. Sci.* 42:3331–3336.
- 695 Bligh, E.G., and W.J. Dyer. 1959. A rapid method of total lipid extraction and purification. *Can.*  
696 *J. Biochem. Physiol.* 37:911–917. doi:10.1139/o59-099.
- 697 Boesze-Battaglia, K., and A.D. Albert. 1992. Phospholipid distribution among bovine rod outer  
698 segment plasma membrane and disk membranes. *Exp. Eye Res.* 54:821–823.  
699 doi:10.1016/0014-4835(92)90040-Y.
- 700 Boesze-Battaglia, K., T. Hennessey, and A.D. Albert. 1989. Cholesterol heterogeneity in bovine  
701 rod outer segment disk membranes. *J. Biol. Chem.* 264:8151–8155.
- 702 Botelho, A.V., N.J. Gibson, R.L. Thurmond, Y. Wang, and M.F. Brown. 2002. Conformational  
703 energetics of rhodopsin modulated by nonlamellar-forming lipids. *Biochemistry.* 41:6354–  
704 6368. doi:10.1021/bi011995g.
- 705 Bush, R.A., C.E. Remé, and A. Malnoë. 1991. Light damage in the rat retina: the effect of dietary  
706 deprivation of N-3 fatty acids on acute structural alterations. *Exp. Eye Res.* 53:741–752.  
707 doi:10.1016/0014-4835(91)90109-r.
- 708 Calandrella, N., C. De Seta, G. Scarsella, and G. Risuleo. 2010. Carnitine reduces the  
709 lipoperoxidative damage of the membrane and apoptosis after induction of cell stress in  
710 experimental glaucoma. *Cell Death Dis.* 1:e62–e62. doi:10.1038/cddis.2010.40.

*Distinct membrane environments of ROS disks*

- 711 Chen, D., D.L. Chao, L. Rocha, M. Kolar, V.A.N. Huu, M. Krawczyk, M. Dasyani, T. Wang, M.  
712 Jafari, M. Jabari, K.D. Ross, A. Saghatelian, B.A. Hamilton, K. Zhang, and D.  
713 Skowronska-Krawczyk. 2020. The lipid elongation enzyme ELOVL2 is a molecular  
714 regulator of aging in the retina. *Aging Cell*. 19:e13100.  
715 doi:<https://doi.org/10.1111/acer.13100>.
- 716 Chen, H., J.-T.A. Tran, A. Eckerd, T.-P. Huynh, M.H. Elliott, R.S. Brush, and N.A. Mandal. 2013.  
717 Inhibition of de novo ceramide biosynthesis by FTY720 protects rat retina from light-  
718 induced degeneration. *J. Lipid Res.* 54:1616–1629. doi:10.1194/jlr.M035048.
- 719 Chen, W., W. Esselman, D. Jump, and J. Busik. 2005. Anti-inflammatory effect of  
720 docosahexaenoic acid on cytokine-induced adhesion molecule expression in human retinal  
721 vascular endothelial cells. *Invest. Ophthalmol. Vis. Sci.* 46:4342–4347.  
722 doi:10.1167/iovs.05-0601.
- 723 Chen, W., D. Jump, W. Esselman, and J. Busik. 2007. Inhibition of cytokine signaling in human  
724 retinal endothelial cells through modification of caveolae/lipid rafts by docosahexaenoic  
725 acid. *Invest. Ophthalmol. Vis. Sci.* 48:18–26. doi:10.1167/iovs.06-0619.
- 726 Cuevas Arenas, R., B. Danielczak, A. Martel, L. Porcar, C. Breyton, C. Ebel, and S. Keller. 2017.  
727 Fast Collisional Lipid Transfer Among Polymer-Bounded Nanodiscs. *Sci. Rep.* 7:45875.  
728 doi:10.1038/srep45875.
- 729 Daemen, F.J.M. 1973. Vertebrate Rod Outer Segment Membranes. *Biochim. Biophys. Acta.*  
730 300:255–288.



*Distinct membrane environments of ROS disks*

- 731 Danielczak, B., and S. Keller. 2018. Collisional lipid exchange among DIBMA-encapsulated  
732 nanodiscs (DIBMALPs). *Eur. Polym. J.* 109:206–213.  
733 doi:10.1016/j.eurpolymj.2018.09.043.
- 734 Dörr, J.M., M.C. Koorengevel, M. Schäfer, A.V. Prokofyev, S. Scheidelaar, E.A.W. van der  
735 Cruijssen, T.R. Dafforn, M. Baldus, and J.A. Killian. 2014. Detergent-free isolation,  
736 characterization, and functional reconstitution of a tetrameric K<sup>+</sup> channel: The power of  
737 native nanodiscs. *Proc. Natl. Acad. Sci.* 111:18607–18612. doi:10.1073/pnas.1416205112.
- 738 Edwards, A.O., L.A. Donoso, and R. Ritter. 2001. A novel gene for autosomal dominant Stargardt-  
739 like macular dystrophy with homology to the SUR4 protein family. *Invest. Ophthalmol.*  
740 *Vis. Sci.* 42:2652–2663.
- 741 Eskandari, S., E.M. Wright, M. Kreman, D.M. Starace, and G.A. Zampighi. 1998. Structural  
742 analysis of cloned plasma membrane proteins by freeze-fracture electron microscopy.  
743 *Proc. Natl. Acad. Sci.* 95:11235–11240. doi:10.1073/pnas.95.19.11235.
- 744 Falk, G., and P. Fatt. 1969. Distinctive properties of the lamellar and disk-edge structures of the  
745 rod outer segment. *J. Ultrastruct. Res.* 28:41–60. doi:10.1016/S0022-5320(69)90005-7.
- 746 Fotiadis, D., Y. Liang, S. Filipek, D.A. Saperstein, A. Engel, and K. Palczewski. 2004. The G  
747 protein-coupled receptor rhodopsin in the native membrane. *FEBS Lett.* 564:281–288.  
748 doi:[https://doi.org/10.1016/S0014-5793\(04\)00194-2](https://doi.org/10.1016/S0014-5793(04)00194-2).
- 749 Fung, B.K., J.B. Hurley, and L. Stryer. 1981. Flow of information in the light-triggered cyclic  
750 nucleotide cascade of vision. *Proc. Natl. Acad. Sci.* 78:152–156.  
751 doi:10.1073/pnas.78.1.152.

*Distinct membrane environments of ROS disks*

- 752 Gakhar, S., S.H. Risbud, and M.L. Longo. 2020. Structure retention of silica gel-encapsulated  
753 bacteriorhodopsin in purple membrane and in lipid nanodiscs. *Colloids Surf. B*  
754 *Biointerfaces*. 186:110680. doi:10.1016/j.colsurfb.2019.110680.
- 755 Ganapathy, S., L. Opdam, Y. Hontani, S. Frehan, Q. Chen, K.J. Hellingwerf, H.J.M. de Groot,  
756 J.T.M. Kennis, and W.J. de Grip. 2020. Membrane matters: The impact of a nanodisc-  
757 bilayer or a detergent microenvironment on the properties of two eubacterial rhodopsins.  
758 *Biochim. Biophys. Acta BBA - Biomembr.* 1862:183113.  
759 doi:10.1016/j.bbamem.2019.183113.
- 760 Gibson, N.J., and M.F. Brown. 1991a. Role of phosphatidylserine in the MI-MII equilibrium of  
761 rhodopsin. *Biochem. Biophys. Res. Commun.* 176:915–921. doi:10.1016/s0006-  
762 291x(05)80273-6.
- 763 Gibson, N.J., and M.F. Brown. 1991b. Membrane lipid influences on the energetics of the  
764 metarhodopsin I and metarhodopsin II conformational states of rhodopsin probed by flash  
765 photolysis. *Photochem. Photobiol.* 54:985–992. doi:10.1111/j.1751-1097.1991.tb02120.x.
- 766 Gibson, N.J., and M.F. Brown. 1993. Lipid headgroup and acyl chain composition modulate the  
767 MI-MII equilibrium of rhodopsin in recombinant membranes. *Biochemistry.* 32:2438–  
768 2454. doi:10.1021/bi00060a040.
- 769 Goldberg, A.F.X., and R.S. Molday. 1996a. Subunit Composition of the Peripherin/rds–Rom-1  
770 Disk Rim Complex from Rod Photoreceptors: Hydrodynamic Evidence for a Tetrameric  
771 Quaternary Structure. *Biochemistry.* 35:6144–6149. doi:10.1021/bi960259n.

*Distinct membrane environments of ROS disks*

- 772 Goldberg, A.F.X., and R.S. Molday. 1996b. Defective subunit assembly underlies a digenic form  
773 of retinitis pigmentosa linked to mutations in peripherin/rds and rom-1. *Proc. Natl. Acad.*  
774 *Sci.* 93:13726–13730. doi:10.1073/pnas.93.24.13726.
- 775 Grant, T., A. Rohou, and N. Grigorieff. 2018. cisTEM, user-friendly software for single-particle  
776 image processing. *eLife.* 7:e35383. doi:10.7554/eLife.35383.
- 777 Grogan, W.M. 1984. Metabolism of arachidonate in rat testis: Characterization of 26–30 carbon  
778 polyenoic acids. *Lipids.* 19:341–346. doi:10.1007/BF02534785.
- 779 Grogan, W.M., and E.G. Huth. 1983. Biosynthesis of long-chain polyenoic acids from arachidonic  
780 acid in cultures of enriched spermatocytes and spermatids from mouse testis. *Lipids.*  
781 18:275–284. doi:10.1007/BF02534702.
- 782 Grogan, W.M., and J.W. Lam. 1982. Fatty acid synthesis in isolated spermatocytes and spermatids  
783 of mouse testis. *Lipids.* 17:604–611. doi:10.1007/BF02535366.
- 784 Gulati, S., M. Jamshad, T.J. Knowles, K.A. Morrison, R. Downing, N. Cant, R. Collins, J.B.  
785 Koenderink, R.C. Ford, M. Overduin, I.D. Kerr, T.R. Dafforn, and A.J. Rothnie. 2014.  
786 Detergent-free purification of ABC (ATP-binding-cassette) transporters. *Biochem. J.*  
787 461:269–278. doi:10.1042/BJ20131477.
- 788 Heck, M., and K.P. Hofmann. 2001. Maximal Rate and Nucleotide Dependence of Rhodopsin-  
789 catalyzed Transducin Activation INITIAL RATE ANALYSIS BASED ON A DOUBLE  
790 DISPLACEMENT MECHANISM. *J. Biol. Chem.* 276:10000–10009.  
791 doi:10.1074/jbc.M009475200.

*Distinct membrane environments of ROS disks*

- 792 Henriksen, J.R., T.L. Andresen, L.N. Feldborg, L. Duelund, and J.H. Ipsen. 2010. Understanding  
793 Detergent Effects on Lipid Membranes: A Model Study of Lysolipids. *Biophys. J.*  
794 98:2199–2205. doi:10.1016/j.bpj.2010.01.037.
- 795 Hiebler, S., T. Masuda, J.G. Hacia, A.B. Moser, P.L. Faust, A. Liu, N. Chowdhury, N. Huang, A.  
796 Lauer, J. Bennett, P.A. Watkins, D.J. Zack, N.E. Braverman, G.V. Raymond, and S.J.  
797 Steinberg. 2014. The Pex1-G844D Mouse: A Model for Mild Human Zellweger Spectrum  
798 Disorder. *Mol. Genet. Metab.* 111:522–532. doi:10.1016/j.ymgme.2014.01.008.
- 799 Hubbard, R., and G. Wald. 1952. Cis-trans isomers of vitamin A and retinene in the rhodopsin  
800 system. *J. Gen. Physiol.* 36:269–315. doi:10.1085/jgp.36.2.269.
- 801 Illing, M., L.L. Molday, and R.S. Molday. 1997. The 220-kDa Rim Protein of Retinal Rod Outer  
802 Segments Is a Member of the ABC Transporter Superfamily. *J. Biol. Chem.* 272:10303–  
803 10310. doi:10.1074/jbc.272.15.10303.
- 804 Jamshad, M., J. Charlton, Y.-P. Lin, S.J. Routledge, Z. Bawa, T.J. Knowles, M. Overduin, N.  
805 Dekker, T.R. Dafforn, R.M. Bill, D.R. Poyner, and M. Wheatley. 2015. G-protein coupled  
806 receptor solubilization and purification for biophysical analysis and functional studies, in  
807 the total absence of detergent. *Biosci. Rep.* 35:e00188. doi:10.1042/BSR20140171.
- 808 Jamshad, M., Y.-P. Lin, T.J. Knowles, R.A. Parslow, C. Harris, M. Wheatley, D.R. Poyner, R.M.  
809 Bill, O.R.T. Thomas, M. Overduin, and T.R. Dafforn. 2011. Surfactant-free purification of  
810 membrane proteins with intact native membrane environment. *Biochem. Soc. Trans.*  
811 39:813–818. doi:10.1042/BST0390813.

*Distinct membrane environments of ROS disks*

- 812 Kessler, C., M. Tillman, M.E. Burns, and E.N. Pugh. 2014. Rhodopsin in the rod surface  
813 membrane regenerates more rapidly than bulk rhodopsin in the disc membranes in vivo. *J.*  
814 *Physiol.* 592:2785–2797. doi:10.1113/jphysiol.2014.272518.
- 815 Kevany, B.M., Y. Tsybovsky, I.D.G. Campuzano, P.D. Schnier, A. Engel, and K. Palczewski.  
816 2013. Structural and Functional Analysis of the Native Peripherin-ROM1 Complex  
817 Isolated from Photoreceptor Cells. *J. Biol. Chem.* 288:36272–36284.  
818 doi:10.1074/jbc.M113.520700.
- 819 Knowles, T.J., R. Finka, C. Smith, Y.-P. Lin, T. Dafforn, and M. Overduin. 2009. Membrane  
820 Proteins Solubilized Intact in Lipid Containing Nanoparticles Bounded by Styrene Maleic  
821 Acid Copolymer. *J. Am. Chem. Soc.* 131:7484–7485. doi:10.1021/ja810046q.
- 822 Kwok, M.C.M., J.M. Holopainen, L.L. Molday, L.J. Foster, and R.S. Molday. 2008. Proteomics  
823 of Photoreceptor Outer Segments Identifies a Subset of SNARE and Rab Proteins  
824 Implicated in Membrane Vesicle Trafficking and Fusion. *Mol. Cell. Proteomics MCP.*  
825 7:1053–1066. doi:10.1074/mcp.M700571-MCP200.
- 826 Lee, A.G. 2003. Lipid–protein interactions in biological membranes: a structural perspective.  
827 *Biochim. Biophys. Acta BBA - Biomembr.* 1612:1–40. doi:10.1016/S0005-2736(03)00056-  
828 7.
- 829 Lenis, T.L., J. Hu, S.Y. Ng, Z. Jiang, S. Sarfare, M.B. Lloyd, N.J. Esposito, W. Samuel, C.  
830 Jaworski, D. Bok, S.C. Finnemann, M.J. Radeke, T.M. Redmond, G.H. Travis, and R.A.  
831 Radu. 2018. Expression of ABCA4 in the retinal pigment epithelium and its implications

*Distinct membrane environments of ROS disks*

- 832 for Stargardt macular degeneration. *Proc. Natl. Acad. Sci.* 115:E11120–E11127.  
833 doi:10.1073/pnas.1802519115.
- 834 Li, Y.-F., R.S. Li, S.B. Samuel, R. Cueto, X.-Y. Li, H. Wang, and X.-F. Yang. 2016.  
835 Lysophospholipids and their G protein-coupled receptors in atherosclerosis. *Front. Biosci.*  
836 *Landmark Ed.* 21:70–88. doi:10.2741/4377.
- 837 Litman, B.J., S.L. Niu, A. Polozova, and D.C. Mitchell. 2001. The role of docosahexaenoic acid  
838 containing phospholipids in modulating G protein-coupled signaling pathways: visual  
839 transduction. *J. Mol. Neurosci. MN.* 16:237–242; discussion 279–284.  
840 doi:10.1385/JMN:16:2-3:237.
- 841 Liu, A., J. Chang, Y. Lin, Z. Shen, and P.S. Bernstein. 2010. Long-chain and very long-chain  
842 polyunsaturated fatty acids in ocular aging and age-related macular degeneration. *J. Lipid*  
843 *Res.* 51:3217–3229. doi:10.1194/jlr.M007518.
- 844 Loewen, C.J.R., and R.S. Molday. 2000. Disulfide-mediated Oligomerization of Peripherin/Rds  
845 and Rom-1 in Photoreceptor Disk Membranes IMPLICATIONS FOR  
846 PHOTORECEPTOR OUTER SEGMENT MORPHOGENESIS AND  
847 DEGENERATION. *J. Biol. Chem.* 275:5370–5378. doi:10.1074/jbc.275.8.5370.
- 848 Logan, S., M.-P. Agbaga, M.D. Chan, N. Kabir, N.A. Mandal, R.S. Brush, and R.E. Anderson.  
849 2013. Deciphering mutant ELOVL4 activity in autosomal-dominant Stargardt macular  
850 dystrophy. *Proc. Natl. Acad. Sci.* 110:5446–5451. doi:10.1073/pnas.1217251110.
- 851 Logan, S., and R.E. Anderson. 2014. Dominant Stargardt Macular Dystrophy (STGD3) and  
852 ELOVL4. *In* Retinal Degenerative Diseases. J.D. Ash, C. Grimm, J.G. Hollyfield, R.E.

*Distinct membrane environments of ROS disks*

- 853 Anderson, M.M. LaVail, and C. Bowes Rickman, editors. Springer, New York, NY. 447–  
854 453.
- 855 MacLean, B., D.M. Tomazela, N. Shulman, M. Chambers, G.L. Finney, B. Frewen, R. Kern, D.L.  
856 Tabb, D.C. Liebler, and M.J. MacCoss. 2010. Skyline: an open source document editor for  
857 creating and analyzing targeted proteomics experiments. *Bioinforma. Oxf. Engl.* 26:966–  
858 968. doi:10.1093/bioinformatics/btq054.
- 859 Martin, R.E., M.H. Elliott, R.S. Brush, and R.E. Anderson. 2005. Detailed Characterization of the  
860 Lipid Composition of Detergent-Resistant Membranes from Photoreceptor Rod Outer  
861 Segment Membranes. *Invest. Ophthalmol. Vis. Sci.* 46:1147–1154. doi:10.1167/iovs.04-  
862 1207.
- 863 Milstein, M.L., B.L. Cavanaugh, N.M. Roussey, S. Volland, D.S. Williams, and A.F.X. Goldberg.  
864 2020. Multistep peripherin-2/rds self-assembly drives membrane curvature for outer  
865 segment disk architecture and photoreceptor viability. *Proc. Natl. Acad. Sci.* 117:4400–  
866 4410. doi:10.1073/pnas.1912513117.
- 867 Mitchell, D.C., M. Straume, and B.J. Litman. 1992a. Role of sn-1-saturated,sn-2-polyunsaturated  
868 phospholipids in control of membrane receptor conformational equilibrium: effects of  
869 cholesterol and acyl chain unsaturation on the metarhodopsin I in equilibrium with  
870 metarhodopsin II equilibrium. *Biochemistry.* 31:662–670. doi:10.1021/bi00118a005.
- 871 Mitchell, D.C., M. Straume, J.L. Miller, and B.J. Litman. 1990. Modulation of metarhodopsin  
872 formation by cholesterol-induced ordering of bilayer lipids. *Biochemistry.* 29:9143–9149.  
873 doi:10.1021/bi00491a007.



*Distinct membrane environments of ROS disks*

- 874 Molday, L.L., and R.S. Molday. 2014. 1D4 – A Versatile Epitope Tag for the Purification and  
875 Characterization of Expressed Membrane and Soluble Proteins. *Methods Mol. Biol. Clifton*  
876 *NJ.* 1177:1–15. doi:10.1007/978-1-4939-1034-2\_1.
- 877 Molday, R.S., D. Hicks, and L. Molday. 1987. Peripherin. A rim-specific membrane protein of rod  
878 outer segment discs. *Invest. Ophthalmol. Vis. Sci.* 28:50–61.
- 879 Nathans, J. 1992. Rhodopsin: structure, function, and genetics. *Biochemistry.* 31:4923–4931.  
880 doi:10.1021/bi00136a001.
- 881 Oluwole, A.O., B. Danielczak, A. Meister, J.O. Babalola, C. Vargas, and S. Keller. 2017.  
882 Solubilization of Membrane Proteins into Functional Lipid-Bilayer Nanodiscs Using a  
883 Diisobutylene/Maleic Acid Copolymer. *Angew. Chem. Int. Ed Engl.* 56:1919–1924.  
884 doi:10.1002/anie.201610778.
- 885 Organisciak, D.T., R.M. Darrow, Y.L. Jiang, and J.C. Blanks. 1996. Retinal light damage in rats  
886 with altered levels of rod outer segment docosahexaenoate. *Invest. Ophthalmol. Vis. Sci.*  
887 37:2243–2257.
- 888 Palczewski, K. 2006. G Protein–Coupled Receptor Rhodopsin. *Annu. Rev. Biochem.* 75:743–767.  
889 doi:10.1146/annurev.biochem.75.103004.142743.
- 890 Papermaster, D.S. 1982. Preparation of retinal rod outer segments. *Methods Enzymol.* 81:48–52.
- 891 Pardon, E., T. Laeremans, S. Triest, S.G.F. Rasmussen, A. Wohlkönig, A. Ruf, S. Muyldermans,  
892 W.G.J. Hol, B.K. Kobilka, and J. Steyaert. 2014. A general protocol for the generation of  
893 Nanobodies for structural biology. *Nat. Protoc.* 9:674–693. doi:10.1038/nprot.2014.039.

*Distinct membrane environments of ROS disks*

- 894 Pessotto, P., P. Valeri, and E. Arrigoni-Martelli. 1994. The Presence of L-Carnitine in Ocular  
895 Tissues of the Rabbit. *J. Ocul. Pharmacol. Ther.* 10:643–651.  
896 doi:10.1089/jop.1994.10.643.
- 897 Pettersen, E.F., T.D. Goddard, C.C. Huang, G.S. Couch, D.M. Greenblatt, E.C. Meng, and T.E.  
898 Ferrin. 2004. UCSF Chimera—A visualization system for exploratory research and  
899 analysis. *J. Comput. Chem.* 25:1605–1612. doi:10.1002/jcc.20084.
- 900 Polans, A., W. Baehr, and K. Palczewski. 1996. Turned on by Ca<sup>2+</sup>! The physiology and  
901 pathology of Ca<sup>2+</sup>-binding proteins in the retina. *Trends Neurosci.* 19:547–554.  
902 doi:10.1016/S0166-2236(96)10059-X.
- 903 Qian, H., X. Zhao, P. Cao, J. Lei, N. Yan, and X. Gong. 2017. Structure of the Human Lipid  
904 Exporter ABCA1. *Cell.* 0. doi:10.1016/j.cell.2017.05.020.
- 905 Quazi, F., S. Lenevich, and R.S. Molday. 2012. ABCA4 is an N-retinylidene-  
906 phosphatidylethanolamine and phosphatidylethanolamine importer. *Nat. Commun.* 3:925.  
907 doi:10.1038/ncomms1927.
- 908 Quazi, F., and R.S. Molday. 2013. Differential Phospholipid Substrates and Directional Transport  
909 by ATP-binding Cassette Proteins ABCA1, ABCA7, and ABCA4 and Disease-causing  
910 Mutants. *J. Biol. Chem.* 288:34414–34426. doi:10.1074/jbc.M113.508812.
- 911 Rakshit, T., S. Senapati, V.M. Parmar, B. Sahu, A. Maeda, and P.S.-H. Park. 2017. Adaptations in  
912 rod outer segment disc membranes in response to environmental lighting conditions.  
913 *Biochim. Biophys. Acta BBA - Mol. Cell Res.* 1864:1691–1702.  
914 doi:10.1016/j.bbamcr.2017.06.013.

*Distinct membrane environments of ROS disks*

- 915 Routledge, S.J., M. Jamshad, H.A. Little, Y.-P. Lin, J. Simms, A. Thakker, C.M. Spickett, R.M.  
916 Bill, T.R. Dafforn, D.R. Poyner, and M. Wheatley. 2020. Ligand-induced conformational  
917 changes in a SMALP-encapsulated GPCR. *Biochim. Biophys. Acta BBA - Biomembr.*  
918 1862:183235. doi:10.1016/j.bbamem.2020.183235.
- 919 SanGiovanni, J.P., E.Y. Chew, E. Agron, T.E. Clemons, M.D. Davis, F.L. Ferris III, G.R. Gensler,  
920 N. Kurinij, A.S. Lindblad, R.C. Milton, and J.M. Seddon. 2007. The Relationship of  
921 Dietary Lipid Intake and Age-Related Macular Degeneration in a Case-Control Study:  
922 AREDS Report No. 20. *Arch. Ophthalmol.* 125:671. doi:10.1001/archopht.125.5.671.
- 923 Sapieha, P., A. Stahl, J. Chen, M.R. Seaward, K.L. Willett, N.M. Krah, R.J. Dennison, K.M.  
924 Connor, C.M. Aderman, E. Liclican, A. Carughi, D. Perelman, Y. Kanaoka, J.P.  
925 SanGiovanni, K. Gronert, and L.E.H. Smith. 2011. 5-Lipoxygenase Metabolite 4-HDHA  
926 Is a Mediator of the Antiangiogenic Effect of  $\omega$ -3 Polyunsaturated Fatty Acids. *Sci. Transl.*  
927 *Med.* 3:69ra12-69ra12. doi:10.1126/scitranslmed.3001571.
- 928 Schmidt, V., and J.N. Sturgis. 2018. Modifying styrene-maleic acid co-polymer for studying lipid  
929 nanodiscs. *Biochim. Biophys. Acta BBA - Biomembr.* 1860:777–783.  
930 doi:10.1016/j.bbamem.2017.12.012.
- 931 Seddon, J.M. 2003. Progression of Age-Related Macular Degeneration: Association With Dietary  
932 Fat, Transunsaturated Fat, Nuts, and Fish Intake. *Arch. Ophthalmol.* 121:1728.  
933 doi:10.1001/archopht.121.12.1728.
- 934 Seddon, J.M. 2006. Cigarette Smoking, Fish Consumption, Omega-3 Fatty Acid Intake, and  
935 Associations With Age-Related Macular Degeneration: The US Twin Study of Age-

*Distinct membrane environments of ROS disks*

- 936 Related Macular Degeneration. *Arch. Ophthalmol.* 124:995.  
937 doi:10.1001/archophth.124.7.995.
- 938 Simonelli, F., C. Manna, N. Romano, G. Nunziata, O. Voto, and E. Rinaldi. 1996. Evaluation of  
939 Fatty Acids in Membrane Phospholipids of Erythrocytes in Retinitis pigmentosa Patients.  
940 *Ophthalmic Res.* 28:93–98. doi:10.1159/000267880.
- 941 Skiba, N.P., W.J. Spencer, R.Y. Salinas, E.C. Lieu, J.W. Thompson, and V.Y. Arshavsky. 2013.  
942 Proteomic Identification of Unique Photoreceptor Disc Components Reveals the Presence  
943 of PRCD, a Protein Linked to Retinal Degeneration. *J. Proteome Res.* 12:3010–3018.  
944 doi:10.1021/pr4003678.
- 945 Sun, H., and J. Nathans. 2001. Mechanistic Studies of ABCR, the ABC Transporter in  
946 Photoreceptor Outer Segments Responsible for Autosomal Recessive Stargardt Disease. *J.*  
947 *Bioenerg. Biomembr.* 33:523–530. doi:10.1023/A:1012883306823.
- 948 Swainsbury, D.J.K., S. Scheidelaar, R. van Grondelle, J.A. Killian, and M.R. Jones. 2014.  
949 Bacterial Reaction Centers Purified with Styrene Maleic Acid Copolymer Retain Native  
950 Membrane Functional Properties and Display Enhanced Stability. *Angew. Chem. Int. Ed.*  
951 53:11803–11807. doi:<https://doi.org/10.1002/anie.201406412>.
- 952 Takamori, S., M. Holt, K. Stenius, E.A. Lemke, M. Grønborg, D. Riedel, H. Urlaub, S. Schenck,  
953 B. Brügger, P. Ringler, S.A. Müller, B. Rammner, F. Gräter, J.S. Hub, B.L. De Groot, G.  
954 Mieskes, Y. Moriyama, J. Klingauf, H. Grubmüller, J. Heuser, F. Wieland, and R. Jahn.  
955 2006. Molecular Anatomy of a Trafficking Organelle. *Cell.* 127:831–846.  
956 doi:10.1016/j.cell.2006.10.030.

*Distinct membrane environments of ROS disks*

- 957 Teo, A.C.K., S.C. Lee, N.L. Pollock, Z. Stroud, S. Hall, A. Thakker, A.R. Pitt, T.R. Dafforn, C.M.  
958 Spickett, and D.I. Roper. 2019. Analysis of SMALP co-extracted phospholipids shows  
959 distinct membrane environments for three classes of bacterial membrane protein. *Sci. Rep.*  
960 9:1–10. doi:10.1038/s41598-018-37962-0.
- 961 Tikhonenko, M., T.A. Lydic, M. Opreanu, S. Li Calzi, S. Bozack, K.M. McSorley, A.L. Sochacki,  
962 M.S. Faber, S. Hazra, S. Duclos, D. Guberski, G.E. Reid, M.B. Grant, and J.V. Busik.  
963 2013. N-3 Polyunsaturated Fatty Acids Prevent Diabetic Retinopathy by Inhibition of  
964 Retinal Vascular Damage and Enhanced Endothelial Progenitor Cell Reparative Function.  
965 *PLoS ONE*. 8. doi:10.1371/journal.pone.0055177.
- 966 Tikhonenko, M., T.A. Lydic, Y. Wang, W. Chen, M. Opreanu, A. Sochacki, K.M. McSorley, R.L.  
967 Renis, T. Kern, D.B. Jump, G.E. Reid, and J.V. Busik. 2010. Remodeling of Retinal Fatty  
968 Acids in an Animal Model of Diabetes: A Decrease in Long-Chain Polyunsaturated Fatty  
969 Acids Is Associated With a Decrease in Fatty Acid Elongases Elovl2 and Elovl4. *Diabetes*.  
970 59:219–227. doi:10.2337/db09-0728.
- 971 Torkhovskaya, T.I., O.M. Ipatova, T.S. Zakharova, M.M. Kochetova, and E.M. Khalilov. 2007.  
972 Lysophospholipid receptors in cell signaling. *Biochem. Biokhimiia*. 72:125–131.  
973 doi:10.1134/s0006297907020010.
- 974 Tsybovsky, Y., T. Orban, R.S. Molday, D. Taylor, and K. Palczewski. 2013. Molecular  
975 organization and ATP-induced conformational changes of ABCA4, the photoreceptor-  
976 specific ABC transporter. *Struct. Lond. Engl.* 1993. 21:854–860.  
977 doi:10.1016/j.str.2013.03.001.

*Distinct membrane environments of ROS disks*

- 978 Ueta, T., K. Kojima, T. Hino, M. Shibata, S. Nagano, and Y. Sudo. 2020. Applicability of Styrene-  
979 Maleic Acid Copolymer for Two Microbial Rhodopsins, RxR and HsSRI. *Biophys. J.*  
980 119:1760–1770. doi:10.1016/j.bpj.2020.09.026.
- 981 Wei, H., Z. Xun, H. Granado, A. Wu, and J.T. Handa. 2016. An easy, rapid method to isolate RPE  
982 cell protein from the mouse eye. *Exp. Eye Res.* 145:450–455.  
983 doi:10.1016/j.exer.2015.09.015.
- 984 Xiang, S.Y., S.S. Dusaban, and J.H. Brown. 2013. Lysophospholipid receptor activation of RhoA  
985 and lipid signaling pathways. *Biochim. Biophys. Acta.* 1831:213–222.  
986 doi:10.1016/j.bbalip.2012.09.004.
- 987 Zhang, K., M. Kniazeva, M. Han, W. Li, Z. Yu, Z. Yang, Y. Li, M.L. Metzker, R. Allikmets, D.J.  
988 Zack, L.E. Kakuk, P.S. Lagali, P.W. Wong, I.M. MacDonald, P.A. Sieving, D.J. Figueroa,  
989 C.P. Austin, R.J. Gould, R. Ayyagari, and K. Petrukhin. 2001. A 5-bp deletion in ELOVL4  
990 is associated with two related forms of autosomal dominant macular dystrophy. *Nat. Genet.*  
991 27:89–93. doi:10.1038/83817.
- 992 Zhang, N., Y. Tsybovsky, A.V. Kolesnikov, M. Rozanowska, M. Swider, S.B. Schwartz, E.M.  
993 Stone, G. Palczewska, A. Maeda, V.J. Kefalov, S.G. Jacobson, A.V. Cideciyan, and K.  
994 Palczewski. 2015. Protein misfolding and the pathogenesis of ABCA4-associated retinal  
995 degenerations. *Hum. Mol. Genet.* 24:3220–3237. doi:10.1093/hmg/ddv073.
- 996 Zulliger, R., S.M. Conley, M.L. Mwoyosvi, M.R. Al-Ubaidi, and M.I. Naash. 2018.  
997 Oligomerization of Prph2 and Rom1 is essential for photoreceptor outer segment  
998 formation. *Hum. Mol. Genet.* 27:3507–3518. doi:10.1093/hmg/ddy240.

999 **ABBREVIATIONS**

1000 The abbreviations used are: ABC, ATP-binding cassette; AcCa, acylcarnitine; AMP, adenosine  
1001 monophosphate; ATR, all-*trans* retinal; BTP, bis-tris propane; CDR, complimentary determining regions;  
1002 Cer, ceramides; ChE, cholesterol ester; CHS, cholesterol hemisuccinate; CMC, critical micelle  
1003 concentration; CNBr, cyanogen bromide; cryoTEM, cryogenic transmission electron microscopy; DDM,  
1004 n-dodecyl  $\beta$ -D-maltoside; DG, diacylglycerol; DHA, docosahexaenoic acid; DIBMA, diisobutylene maleic  
1005 acid; DIBMALP, diisobutylene maleic acid lipid particles; ECD, extracytosolic domain; EW, elution wash;  
1006 FA, fatty acid; FFA, free fatty acid; FT, flow-through; FWR, framework regions; GPCR, G protein-coupled  
1007 receptor; H1/2/3, hypervariable regions or loops 1/2/3; IHC, immunohistochemistry; kDa, kilodalton; KLH,  
1008 keyhole limpet hemocyanin; KO, knock-out; L, load; LC-MS, liquid chromatography-mass spectrometry;  
1009 LC-PUFA, long chain-polyunsaturated fatty acid; LMNG, laurel maltose neopentyl glycol; LPA, lyso-  
1010 phosphatidic acid; LPC, lyso-phosphatidylcholine; LPE, lyso-phosphatidylethanolamine; LUV, large  
1011 unilamellar vesicles; lyso-PL, lyso-phospholipid; mAb, monoclonal antibody; MG, monoacylglycerol; MS,  
1012 mass spectroscopy; MSP, membrane scaffold protein; Nb, nanobody; N-ret-PE, N-retinylidene-  
1013 phosphatidylethanolamine; nsTEM, negative stain transmission electron microscopy; PA, phosphatidic  
1014 acid; PAGE, polyacrylamide gel electrophoresis; PBS, phosphate-buffered saline; PBST, phosphate-  
1015 buffered saline with Tween-20; PC, phosphatidylcholine; PE, phosphatidylethanolamine; PRPH2,  
1016 peripherin2; PI, phosphatidylinositol; PS, phosphatidylserine; PVDF, polyvinylidene difluoride; Res, resin;  
1017 ROM1, rod outer segment membrane protein 1; ROS, rod outer segment; RPE65, retinal pigment  
1018 epithelium-specific 65 kDa protein; RT, room temperature; SEC, size exclusion chromatography; SMA,  
1019 styrene maleic acid; SMALP, styrene maleic acid lipid particle; SDS, sodium dodecyl sulfate; TCEP, tris(2-  
1020 carboxyethyl)phosphine); TG, triacylglycerol; TMD, transmembrane domain; VLC-PUFA, very long  
1021 chain-polyunsaturated fatty acid; W1-4, wash 1-4; WT, wild-type.

1022

1023

*Distinct membrane environments of ROS disks*

1024 **Table 1.** Comparison of relative PL compositions in native ROS membrane domains.<sup>1</sup>

| Phospholipid | rhodopsin                    | ABCA4       | PRPH2/ROM1  | ROS disk <sup>a</sup>                  | ROS PM <sup>a</sup> |
|--------------|------------------------------|-------------|-------------|----------------------------------------|---------------------|
|              | <i>Copurifying in SMALPs</i> |             |             | <i>Isolated in ricin/Au separation</i> |                     |
| PC           | 39.6 ± 3.8                   | 60.9 ± 15.6 | 60.1 ± 11.8 | 45.3 ± 3.2                             | 65.1 ± 3.8          |
| PE           | 54.0 ± 2.7                   | 34.7 ± 17.3 | 37.0 ± 11.4 | 41.6 ± 2.6                             | 10.6 ± 2.8          |
| PG           | 0.2 ± 0.1                    | 0.1 ± 0.1   | 0.1 ± 0.03  | -                                      | -                   |
| PI           | 1.1 ± 0.6                    | 0.6 ± 0.7   | 0.2 ± 0.1   | 2.5 ± 0.8                              | < 1.0               |
| PS           | 5.1 ± 3.4                    | 3.7 ± 2.9   | 2.6 ± 0.6   | 13.7 ± 2.1                             | 24.1 ± 2.8          |

1025 <sup>1</sup>Total values for all PLs detected in positive mode of LC/MS were used to estimate of the relative PL  
 1026 composition in each SMALP-extracted membrane region. Each value is presented as a mean percentage ±  
 1027 standard deviation. Comparison values from prior ROS disk and PM isolation are taken from <sup>a</sup>(Boesze-  
 1028 Battaglia and Albert, 1992). Values for PG not included in Boesze-Battaglia and Albert, 1992 are noted  
 1029 with “-”, and “< 1.0” refers to a value not reported for being less than 1%.

1030 **Table 2.** Comparison of weighted lipid composition of ROS disk-specific membrane proteins.<sup>1</sup>

| Disk Protein | APEX <sup>a</sup> | A <sub>n</sub> | T <sub>n</sub> | # lipids per protein | WLC   | WLC (%) |
|--------------|-------------------|----------------|----------------|----------------------|-------|---------|
| rhodopsin    | 0.1580841         | 0.663          | 7              | 264.6                | 175.3 | 68.3    |
| PRPH2/ROM1   | 0.0614938         | 0.258          | 16             | 232.3                | 59.9  | 23.3    |
| ABCA4        | 0.0073837         | 0.031          | 12             | 246.7                | 7.6   | 3.0     |
| GC-1         | 0.0073970         | 0.031          | 1              | 286.2                | 8.9   | 3.5     |
| R9AP         | 0.0016516         | 0.007          | 1              | 286.2                | 2.0   | 0.8     |
| ATP8A2       | 0.0013005         | 0.005          | 10             | 253.8                | 1.4   | 0.5     |
| GC-2         | 0.0012608         | 0.005          | 1              | 286.2                | 1.5   | 0.6     |

1031 <sup>1</sup>Absolute protein expression (APEX) levels are taken from <sup>a</sup>(Kwok et al., 2008). A<sub>n</sub> is each the APEX value  
 1032 of each protein, n, divided by the sum of all APEX values of disk-specific proteins. T<sub>n</sub> is the number of  
 1033 transmembrane helices of each disk-specific protein, n. WLC is the calculated weighted lipid composition  
 1034 of the theoretical SMALP of each protein, as described by **Eq. 1**. GC-1 and -2 are guanylyl cyclase 1 and  
 1035 2, respectively. R9AP is regulator of G protein signaling 9-binding protein. ATP8A2 is ATPase



*Distinct membrane environments of ROS disks*

1036 aminophospholipid transporter type 8A, member 2. Based on the estimation of WLC percent in the last  
1037 column, rhodopsin, PRPH2/ROM1 and ABCA4 SMALPs account for 95% of the membrane lipids of ROS  
1038 disks when extracted in SMA.

1039

1040

1041

1042

1043

1044

1045

1046

1047

1048

1049

1050

1051

1052

1053

1054

1055

1056

1057

1058

1059

*Distinct membrane environments of ROS disks*

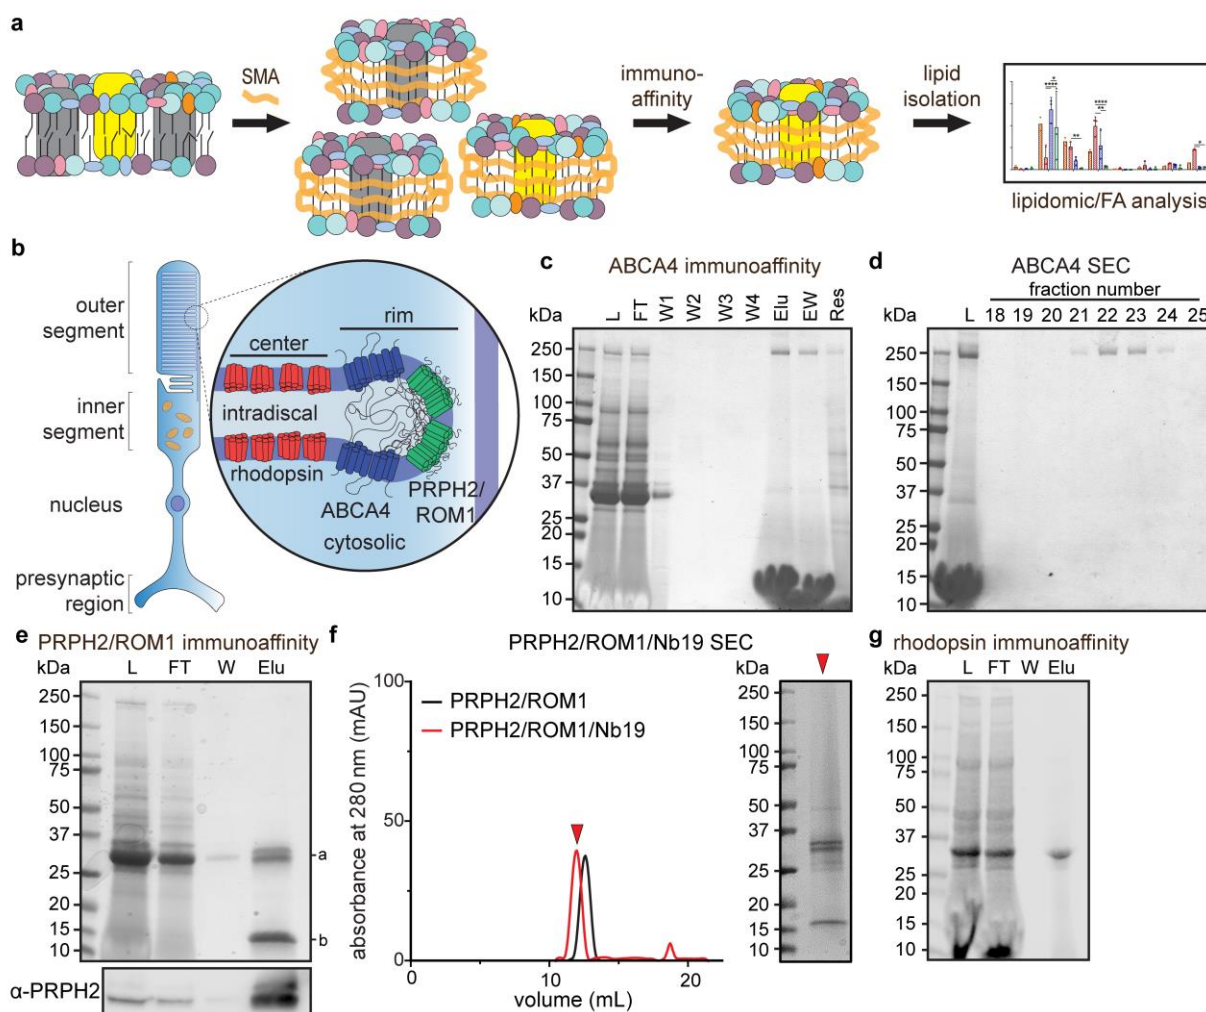

1060

1061 **Figure 1.** Detergent-free purification of native proteins from bovine ROS by immunoaffinity

1062 chromatography. (a) Native lipids isolated by the SMALP co-immunopurification procedure. SMA extracts

1063 membrane proteins with their native lipids; the SMALPs may then be subjected to immunoaffinity

1064 chromatography for purification of native nanodisks, enabling analysis of copurifying lipids. (b) The

1065 intricate membrane structure of ROS disks in rod photoreceptors. Three major membrane protein

1066 components are rhodopsin, ABCA4, and PRPH2/ROM1. (c) Detergent-free, immunoaffinity purification

1067 of ABCA4 using the CL2 mAb. L, soluble ROS (16 mL, 10  $\mu$ L loaded); FT, flow-through (16 mL, 10  $\mu$ L

1068 loaded); W1-4, washes 1-4 (each 15 mL, 10  $\mu$ L loaded); Elu, elution (1 mL, 10  $\mu$ L loaded); EW, wash of

1069 column after elution (1 mL, 10  $\mu$ L loaded); Res, resin (1 mL, 10  $\mu$ L loaded). Stained with Coomassie Blue

1070 R250. (d) Detergent-free size exclusion chromatography (SEC) of combined elution fractions, 18-25

*Distinct membrane environments of ROS disks*

1071 fraction numbers, 0.5 mL fractions from SEC, 10  $\mu$ L loaded per lane. Stained with Coomassie Blue R250.  
1072 (e) Detergent-free, immunoaffinity purification of PRPH2/ROM1 (a) using the Nb19 nanobody (b). L,  
1073 soluble ROS (10 mL, 10  $\mu$ L loaded); FT, flow-through (10 mL, 10  $\mu$ L loaded); W, wash (10 mL, 10  $\mu$ L  
1074 loaded); Elu, elution (2.5 mL, 2.5  $\mu$ L loaded). Bottom panel, anti-PRPH22 immunoblot of the above  
1075 samples. (f) Detergent-free size exclusion chromatography of combined elution from Nb19-immunoaffinity  
1076 purification. (*Left*) PRPH2/ROM1 incubated with Nb19 (red) elutes earlier than PRPH2/ROM1 alone  
1077 (black). (*Right*) Peak PRPH2/ROM1/Nb19 fraction run on SDS-PAGE and stained with Coomassie Blue  
1078 R250. (g) Detergent-free, immunoaffinity purification of rhodopsin using the 1D4 mAb. L, soluble ROS  
1079 (16 mL, 10  $\mu$ L loaded); FT, flow-through (16 mL, 10  $\mu$ L loaded); W, wash (15 mL, 10  $\mu$ L loaded); Elu,  
1080 elution (1 mL, 10  $\mu$ L loaded).  
1081

*Distinct membrane environments of ROS disks*

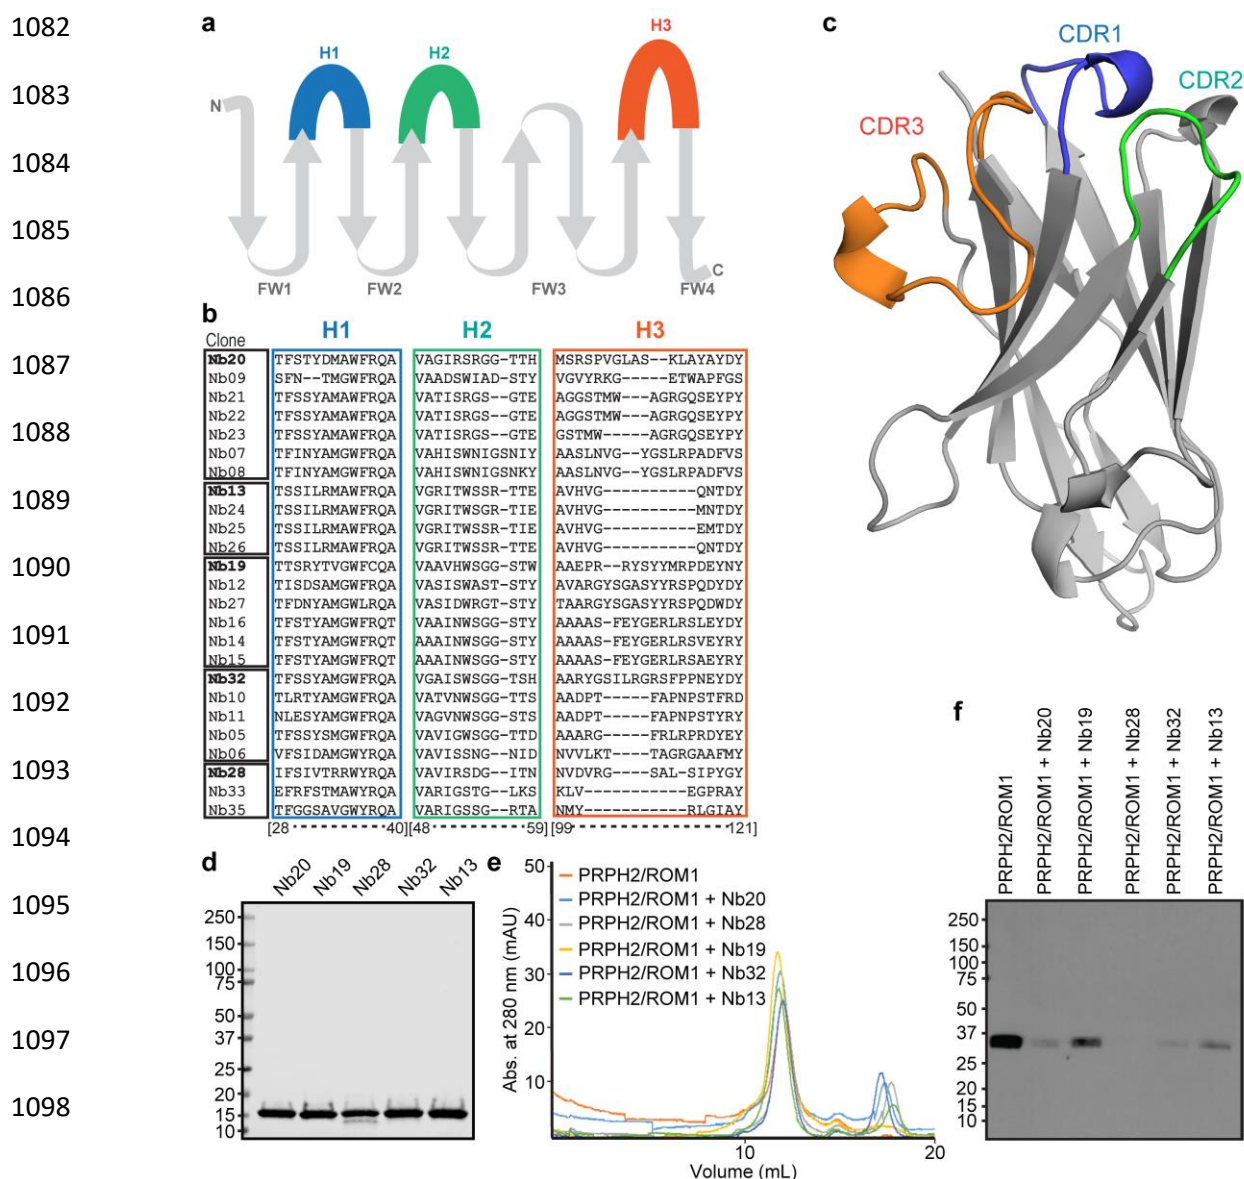

**Figure 2. Biochemical characterization of the PRPH2/ROM1/Nb19 complex.** (a) The secondary structure of the Nb domain consists of 9 beta sheets separated by loop regions. H1, H2, and H3 are separated by four framework regions (FWR's). (b) Each of the five delineated Nb families are defined by boxes around the clone names. Hypervariable region sequences H1, H2, and H3 are listed after each clone name and boxed in blue, green and orange respectively. (c) Robetta-homology modeled Nb19 is shown, highlighting extended CDR regions encoded by hypervariable regions defined in (b). (d) 10 µg of purified Nb20, Nb19, Nb28, Nb32, and Nb13 were subjected to SDS-PAGE to indicate purity (stained with Coomassie Blue R250). (e) 10 µg of PRPH2/ROM1 was subjected to SP-200 gel filtration alone or after incubation with 20

*Distinct membrane environments of ROS disks*

1107  $\mu\text{g}$  of Nb. Nb19 caused the greatest shift in volume of elution. (f) Immunoprecipitation of PRPH2/ROM1  
1108 from solubilized rod OS with Nbs. First lane, purified PRPH2/ROM1 (1.0  $\mu\text{g}$ ), was used as a positive  
1109 control. Detection of PRPH2/ROM1 was performed by immunoblotting with the C6 (anti-PRPH2) and 2H5  
1110 (anti ROM1) antibodies. Nb19-mediated immunoprecipitation produced the greatest quantity of  
1111 PRPH2/ROM1.

1112

1113

1114

1115

1116

1117

1118

1119

1120

1121

1122

1123

1124

1125

1126

1127

1128

1129

1130

1131

1132

1133

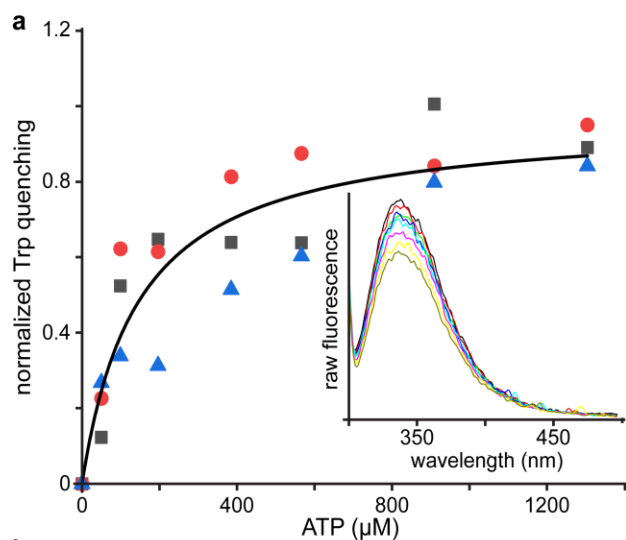

1134

1135

1136

1137

1138

1139

1140

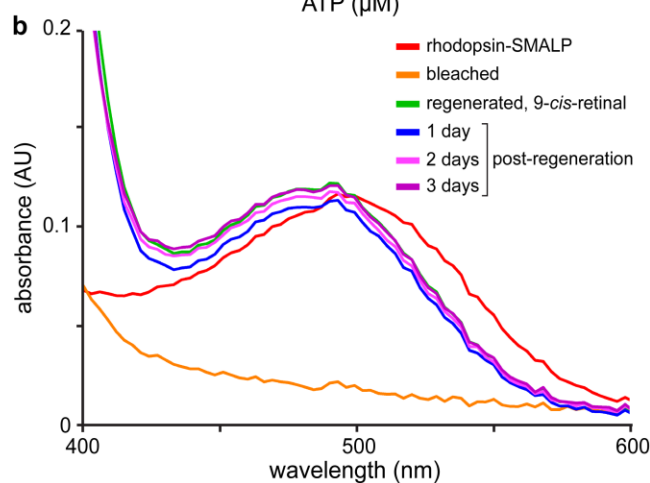

1141 **Figure 3. SMALP-encapsulated proteins retain ligand binding capacity. (a)** ABCA4 extracted and purified

1142 in SMALPs shows intrinsic Trp-quenching characteristic of ATP transporters in the presence of serially-

1143 added ATP ( $K_D = 133.5 \mu\text{M}$ ). Three separate experiments are shown with different symbols. Langmuir

1144 binding isotherm curve (black) fit to the average of 3 runs ( $B_{\text{max}} = 11.85\%$ ,  $17.91\%$ , and  $10.00\%$  for black,

1145 red, and blue, respectively). **Inset:** One set of spectra for increasing concentrations of ATP, showing

1146 diminution of raw fluorescence. **(b)** Absorption spectra of purified rhodopsin in SMALPs. Rhodopsin

1147 extracted and purified in SMA retains the chromophore throughout purification in the dark (red). Rhodopsin

1148 is able to be bleached when exposed to bright light and hydroxylamine and then regenerated by addition of

1149 *9-cis*-retinal. The regenerated rhodopsin sample (Regen. *9-cis*) retains the chromophore over several days

1150 at room temperature.

*Distinct membrane environments of ROS disks*

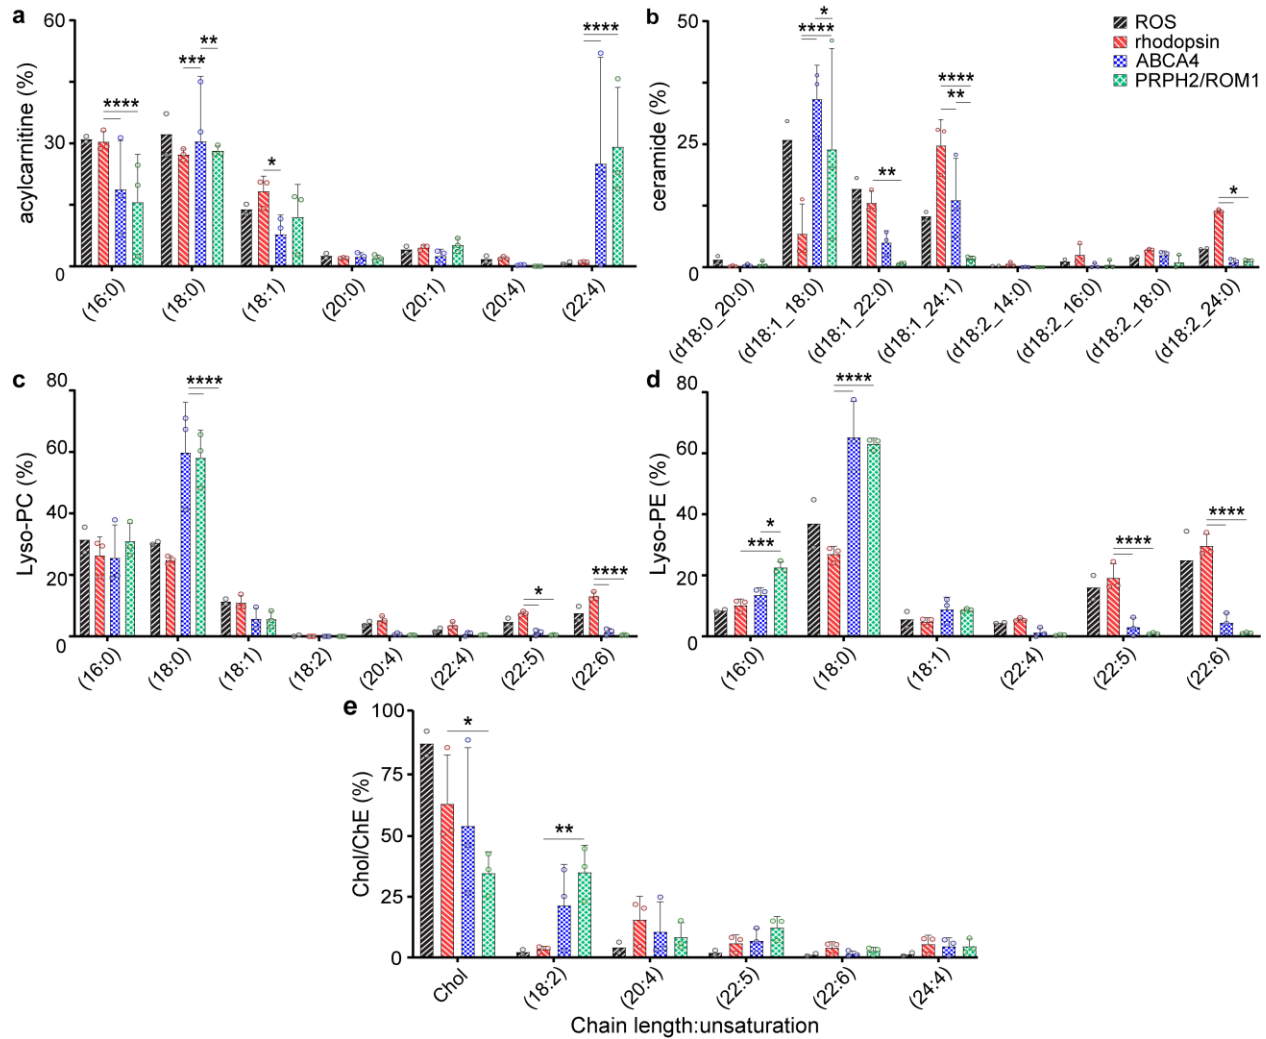

1151

1152 **Figure 4.** Lipid compositions of SMALP-embedded ROS membrane proteins are distinct to their native

1153 location in the membrane. (a-e) Percentages are shown of every detected species of AcCa, Cer, LPC, LPE,

1154 and cholesterol/ChE, respectively, extracted from SMALPs. Selected species are graphed (all species are

1155 shown in **Fig. S2-5**). Total ROS: black forward stripe; rhodopsin: red backward stripe; ABCA4: blue

1156 checker; PRPH2/ROM1: green diamond. ROS measured in duplicate as noted by individual data points

1157 (open circles). Percent composition was derived from each sample by dividing the area under the curve for

1158 each species in a class by the total area under the curve for the class reported *via* LC-MS after correction

1159 for variations in internal standard area, sample mass, and sample injection volume. Statistics were

1160 determined using two-way ANOVA with Tukey's multiple comparisons post-hoc test. Significance values

1161 are indicated as follows: \*,  $P < 0.05$ ; \*\*,  $P < 0.01$ ; \*\*\*,  $P < 0.001$ ; \*\*\*\*,  $P < 0.0001$ .



*Distinct membrane environments of ROS disks*

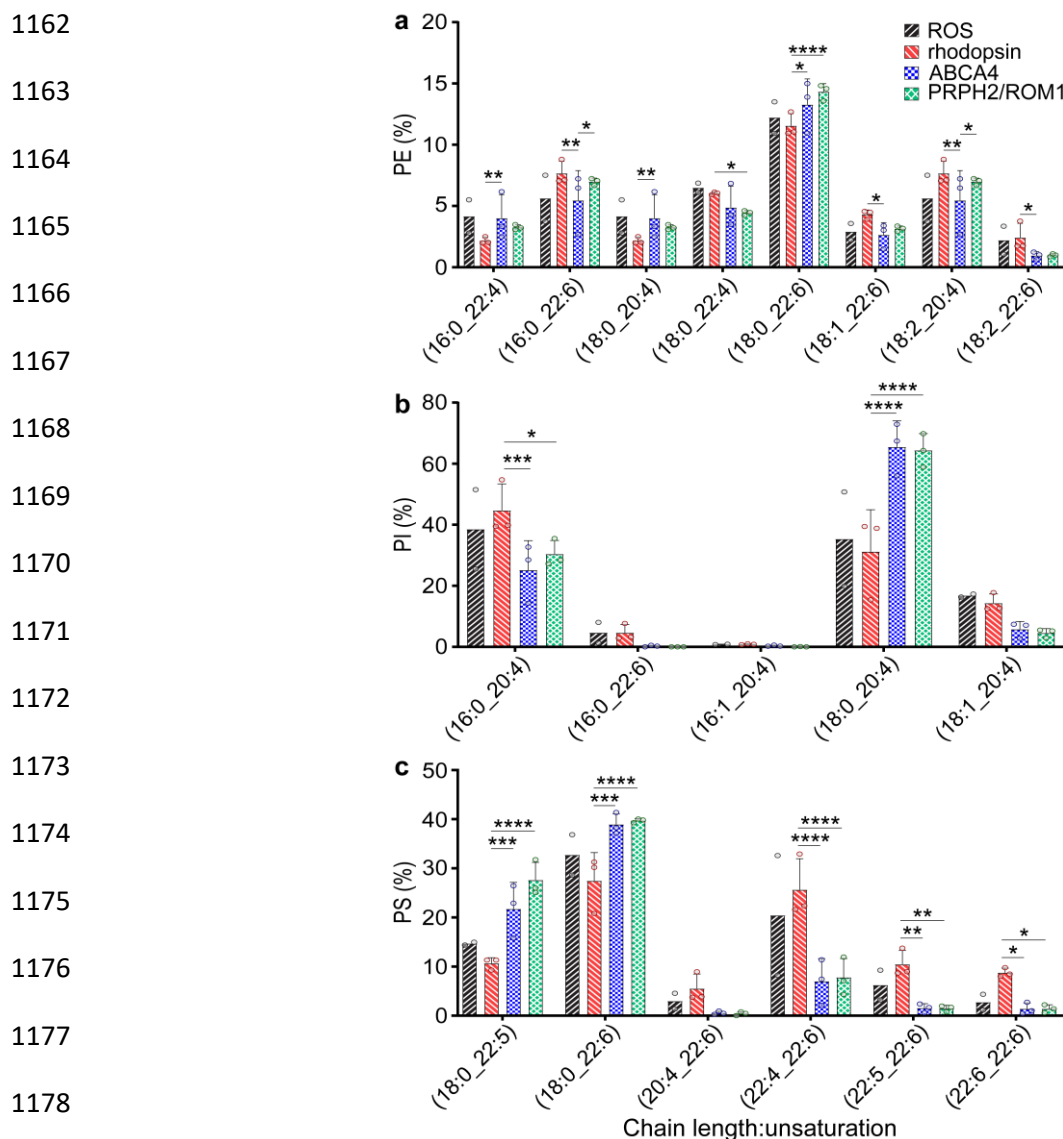

1179 **Figure 5.** *Phospholipid compositions of SMALP-embedded ROS membrane proteins are distinct to their*  
 1180 *native location in the membrane. (a-c)* Percentages are shown of every detected species of PE, PI, and PS,  
 1181 extracted from SMALPs; selected PL species are shown here (all PL species are shown in **Figs. S2-5**). Total  
 1182 ROS: black forward stripe; rhodopsin: red backward stripe; ABCA4: blue checker; PRPH2/ROM1: green  
 1183 diamond. ROS measured in duplicate as noted by individual data points (open circles). Major differences  
 1184 are evident between ABCA4 and PRPH2/ROM1 (rim) and rhodopsin (center). Percent composition was  
 1185 derived for each sample by dividing the area under curve for each species in a class by the total area under  
 1186 curve for the class reported *via* LC-MS after internal standard, sample mass, and sample injection volume  
 1187 correction. Statistics were determined using two-way ANOVA with Tukey's multiple comparisons post-



*Distinct membrane environments of ROS disks*

1188 hoc test. Statistical significance values are indicated as follows: \*,  $P < 0.05$ ; \*\*,  $P < 0.01$ ; \*\*\*,  $P < 0.001$ ;

1189 \*\*\*\*,  $P < 0.0001$ .

1190

1191

1192

1193

1194

1195

1196

1197

1198

1199

1200

1201

1202

1203

1204

1205

1206

1207

1208

1209

1210

1211

1212

1213

*Distinct membrane environments of ROS disks*

1214  
1215  
1216  
1217  
1218  
1219  
1220  
1221  
1222  
1223  
1224  
1225  
1226  
1227  
1228  
1229  
1230  
1231  
1232  
1233  
1234  
1235  
1236  
1237  
1238  
1239

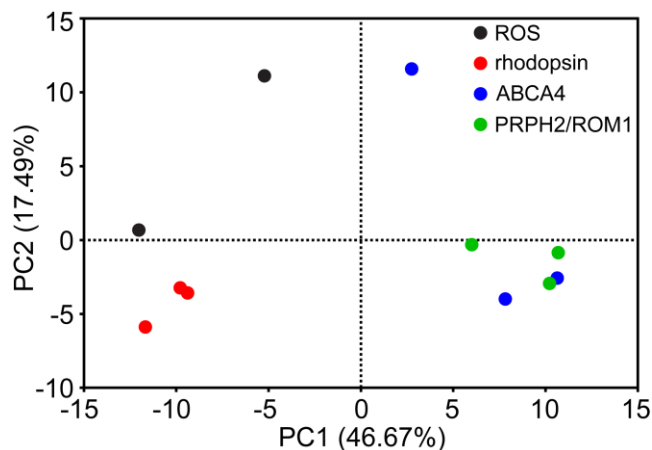

**Figure 6.** *PCA groups rim region samples apart from central, rhodopsin samples.* PCA of 199 lipid species from 14 lipid classes shows clustering of rim samples away from rhodopsin samples, highlighting, in an unbiased manner, the similarity of the rim membrane lipids and the center region lipids. PC1 and PC2 combined to equal 64.16% of the total variance. PC1-3 had eigenvalues greater than the 95<sup>th</sup> percentile of eigenvalues randomly generated through parallel analysis (1000 simulations conducted), but PC3 was not used because of its lower proportion of the variance (13.51%).

*Distinct membrane environments of ROS disks*

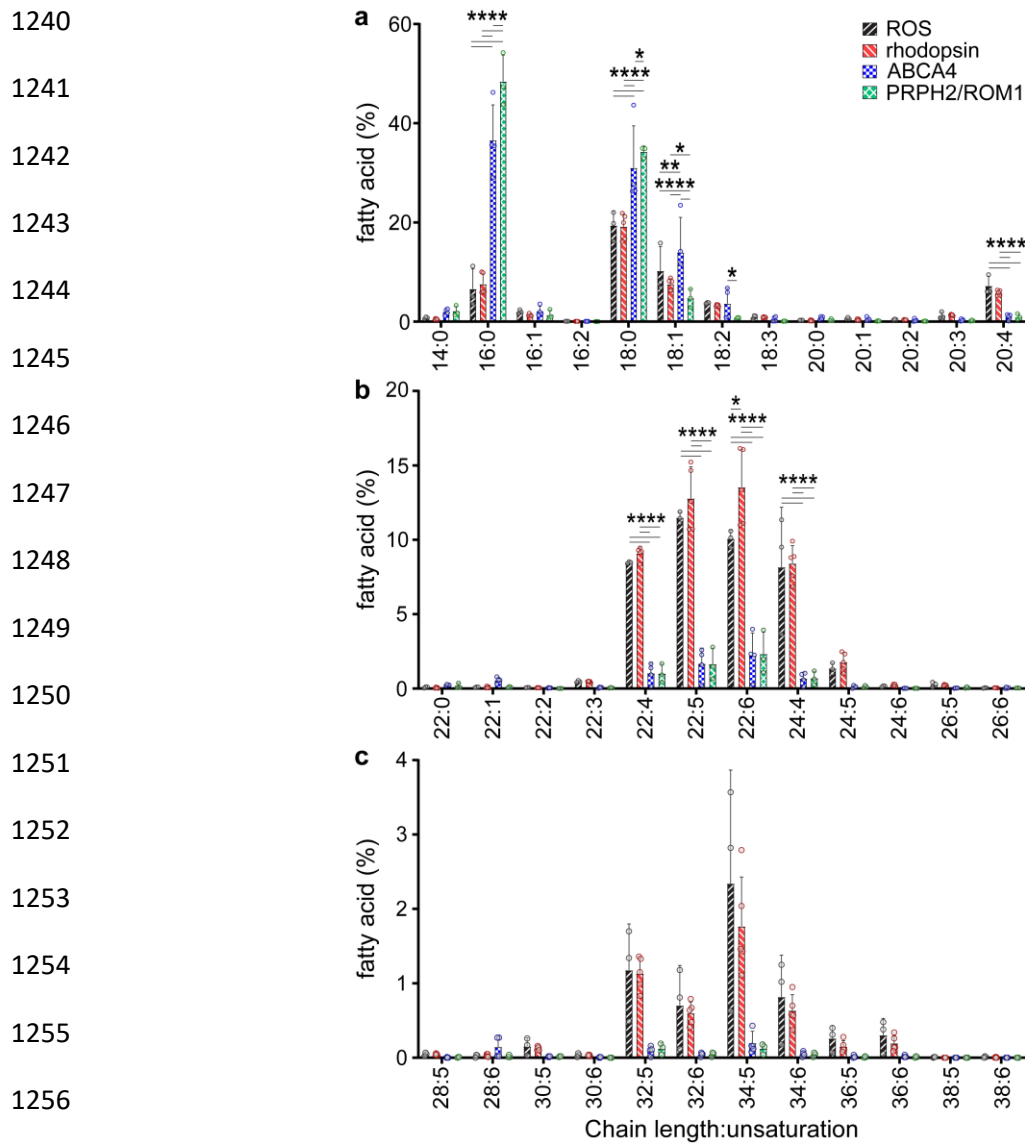

**Figure 7.** Comparison of FA chain lengths between the center and rim of ROS disks shows relative enrichment of shorter chain lengths in the rim and LC- and VLC-PUFAs in the center. (a) Relative molar percentages are shown of every detected class of FA molecule (C14-20) extracted from the SMALPs of each purified protein. (b) Relative molar percentages are shown of every detected class of FA molecule (C22-26) extracted from the SMALPs of each purified protein. (c) Relative molar percentages are shown of every detected class of FA molecule (C28-38) extracted from the SMALPs of each purified protein. Total ROS: black forward stripe; rhodopsin: red backward stripe; ABCA4: blue checker; PRPH2/ROM1: green diamond. The significance of differences between the means was determined using two-way ANOVA with

*Distinct membrane environments of ROS disks*

1266 Tukey's multiple comparisons post-hoc test. ROS: n = 3, rhodopsin: n = 5, ABCA4: n = 4, PRPH2/ROM1:  
1267 n = 3. Significance values are indicated as follows: \*,  $P < 0.05$ ; \*\*,  $P < 0.01$ ; \*\*\*,  $P < 0.001$ ; \*\*\*\*,  $P <$   
1268 0.0001.

1269

1270

1271

1272

1273

1274

1275

1276

1277

1278

1279

1280

1281

1282

1283

1284

1285

1286

1287

1288

1289

1290

1291

*Distinct membrane environments of ROS disks*

1292  
1293  
1294  
1295  
1296  
1297  
1298  
1299  
1300  
1301  
1302  
1303  
1304  
1305  
1306  
1307  
1308  
1309  
1310

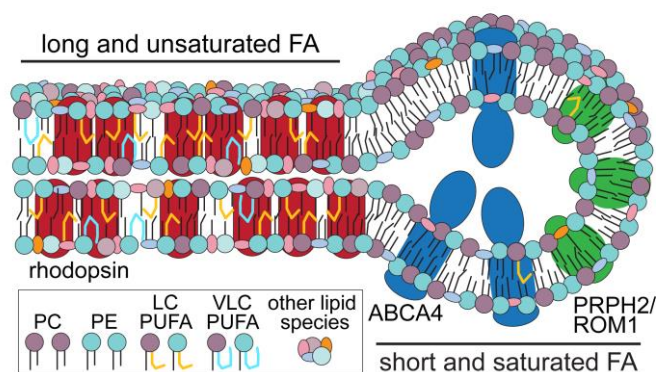

**Figure 8.** *ROS disks have regionally distinct microenvironments.* The center region of ROS disks, rich in rhodopsin, have an abundance of long and unsaturated FAs. Rim regions of ROS disks have relatively high amounts of short and saturated FAs. There are many other distinctions in lipid species between the two regions, including relative amounts of PC and PE.

*Distinct membrane environments of ROS disks*

1311

**Supplemental Figures**

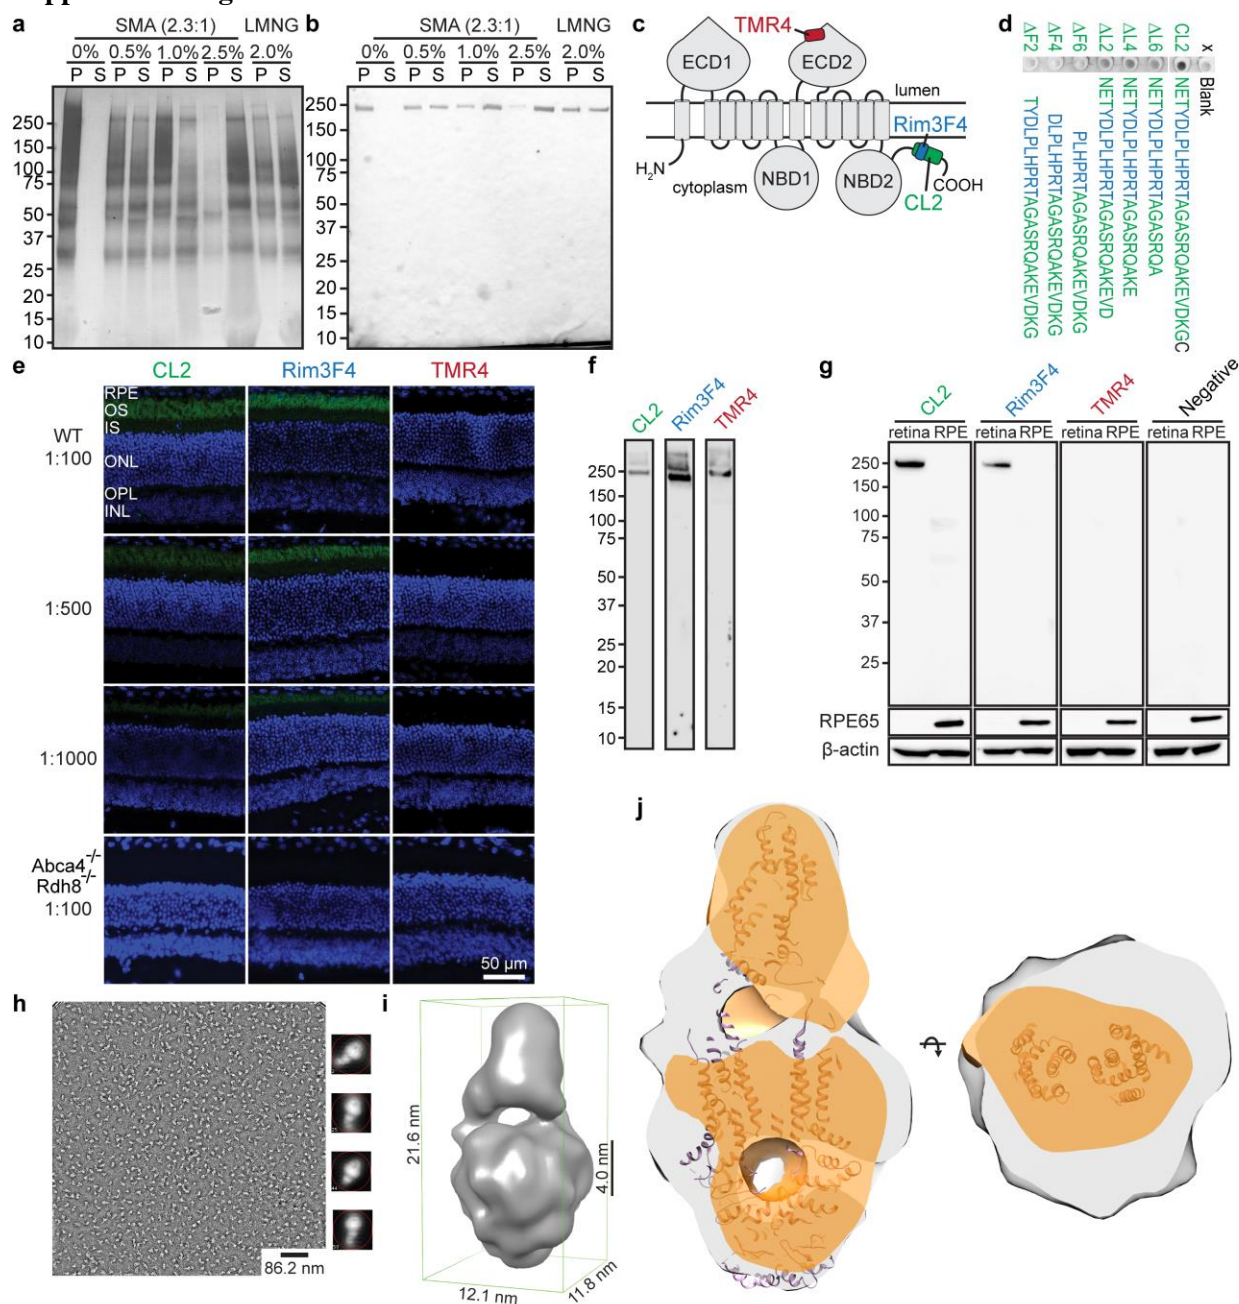

1312 **Supplemental Figure 1.** SMA extracts ROS yielding more ABCA4, mAb CL2 recognizes ABCA4, and

1313 ABCA4 purified with CL2 shows increased transmembrane density, suggesting SMALP has formed. (a)

1314 Extraction of ROS proteins by various concentrations of SMA, or by the low-CMC detergent LMNG.

1315 Residual ROS pellets after initial detergent extraction were solubilized with 10% SDS. P, pellet; S, soluble.

1316 (b) Immunoblotting demonstrates a graded extraction of ABCA4 with increasing amounts of SMA. (c)

1317 Topographical map of ABCA4 highlighting the epitopes of three monoclonal antibodies, TMR4, Rim3F4,

*Distinct membrane environments of ROS disks*

1318 and CL2. **(d)** Dot blots of polypeptides comprised of the amino acid chains shown to the right were used to  
1319 confirm the novel epitope of CL2 on the C-terminus of ABCA4. Truncations of the beginning of the  
1320 sequence decreased the binding of CL2. The Rim3F4 epitope is depicted in blue. **(e)** Immunohistochemistry  
1321 of retinal cryosections from 2-month-old WT and *Abca4*<sup>-/-</sup>*Rdh8*<sup>-/-</sup> KO mice, using CL2, Rim3F4 and TMR4  
1322 antibodies against ABCA4 (green) at three different dilutions. As expected, no fluorescence signal occurred  
1323 with the KO mouse cryosections. With cryosections from WT mice, primary incubations with CL2 and  
1324 Rim3F4 antibodies showed specific immunoreactivity with photoreceptor outer segments at all three  
1325 dilutions, whereas TMR4 did not generate a fluorescence signal. Scale bar: 50  $\mu$ m. **(f)** Relative amount of  
1326 ABCA4 present in solubilized bovine ROS as assessed by immunoblotting. Stock concentrations of 1  
1327 mg/mL were used for all antibodies, and the dilution was 1:10,000 for each antibody tested. **(g)** Immunoblot  
1328 of retinal and RPE lysates obtained from 2-month-old WT mouse using CL2, Rim3F4 and TMR4  
1329 antibodies. Probing with CL2 and Rim3F4 antibodies resulted in a specific band at 250 kDa in the retinal  
1330 samples, which corresponds to the size of ABCA4; whereas no positive signal was detected with TMR4.  
1331 RPE65 (65 kDa) served as the control for tissue sample purity, and  $\beta$ -actin (42 kDa) served as the loading  
1332 control. **(h)** Negative stain micrograph of a representative SMA-CL2 preparation with 2D classes to the  
1333 right; 60,000x magnification. SMALP-extracted ABCA4 shows an increase in transmembrane domain  
1334 density, indicative of a native lipid belt. Scale bar: 86.2 nm. **(i)** 3D reconstruction of ABCA4 at  $\sim 18$  Å  
1335 resolution showing a putative bilayer thickness in the region of the SMALP. **(j)** SMALP-embedded ABCA4  
1336 (gray) shows considerably more density within the predicted TMD region compared to: (1) a prior ABCA4  
1337 negative-stained structure (EMDB-5497 (orange), solubilized in n-dodecyl  $\beta$ -D-maltoside (DDM) and then  
1338 switched into amphipol); and (2) the ABCA4 homolog, ABCA1 (EMDB-6724 (purple ribbon), solubilized  
1339 in DDM and cholesterol hemisuccinate (CHS) and then switched into digitonin). We interpret these  
1340 differences to be explained by the SMALP nanodisc containing native lipids surrounding the TMD of  
1341 ABCA4.

1342

1343



*Distinct membrane environments of ROS disks*

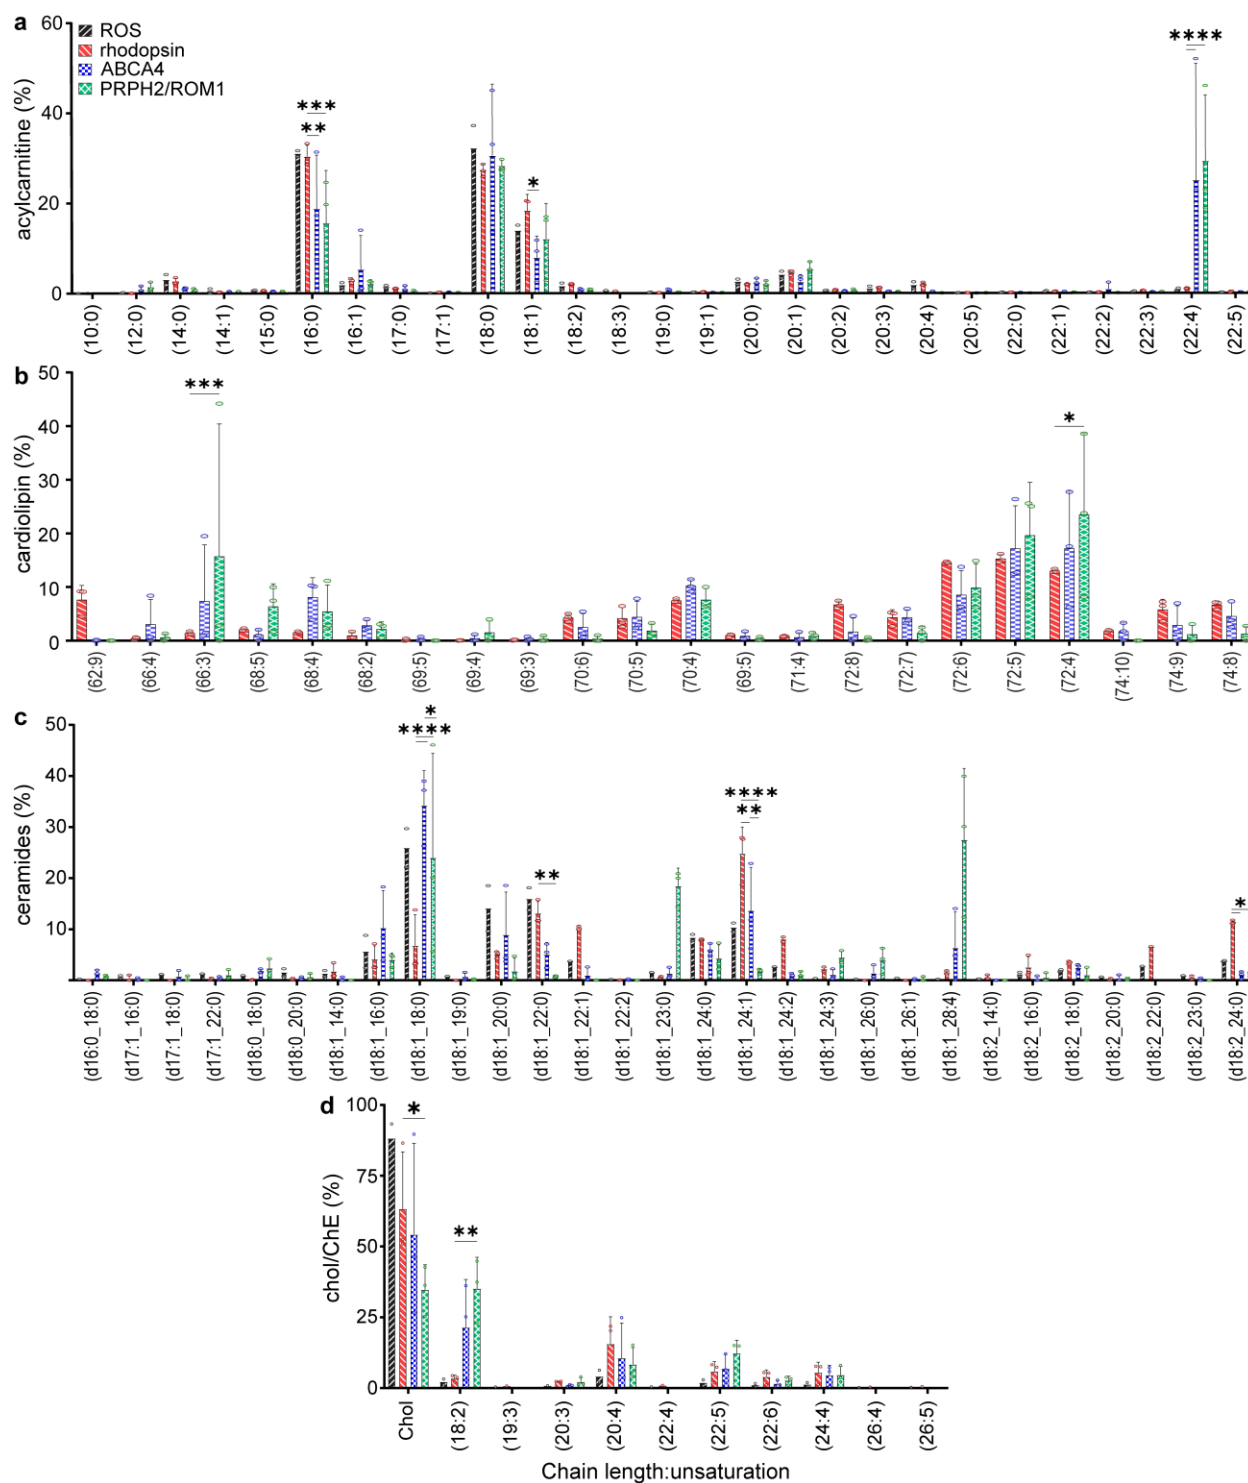

1344  
 1345 **Supplemental Figure 2.** Complete set of detected species for AcCa, cardiolipin, Cer, and cholesterol/ChE.  
 1346 (a-d) Every detected species of lipid that copurified with each sample is shown as a percentage of each  
 1347 respective class (class noted on y-axis). Cardiolipin chain lengths and unsaturation levels summed together.



*Distinct membrane environments of ROS disks*

1348 Total ROS: black forward stripe; rhodopsin: red backward stripe; ABCA4: blue checker; PRPH2/ROM1:  
1349 green diamond. Number of measurements for each sample of each species varies and is noted by the  
1350 individual data points for each bar (open circles). Percent composition was calculated for each sample by  
1351 dividing the area under the curve for each species in a class by the total area under the curve for that class,  
1352 measured *via* LC-MS after correction for variations in internal standard area, sample mass, and sample  
1353 injection volume. Statistics were determined using two-way ANOVA with Tukey's multiple comparisons  
1354 post-hoc test between samples that had at least 3 detected replicates. Statistical significance values are  
1355 indicated as follows: \*,  $P < 0.05$ ; \*\*,  $P < 0.01$ ; \*\*\*,  $P < 0.001$ ; \*\*\*\*,  $P < 0.0001$ .

1356

1357

1358

1359

1360

1361

1362

1363

1364

1365

1366

1367

1368

1369

1370

1371

1372

1373

*Distinct membrane environments of ROS disks*

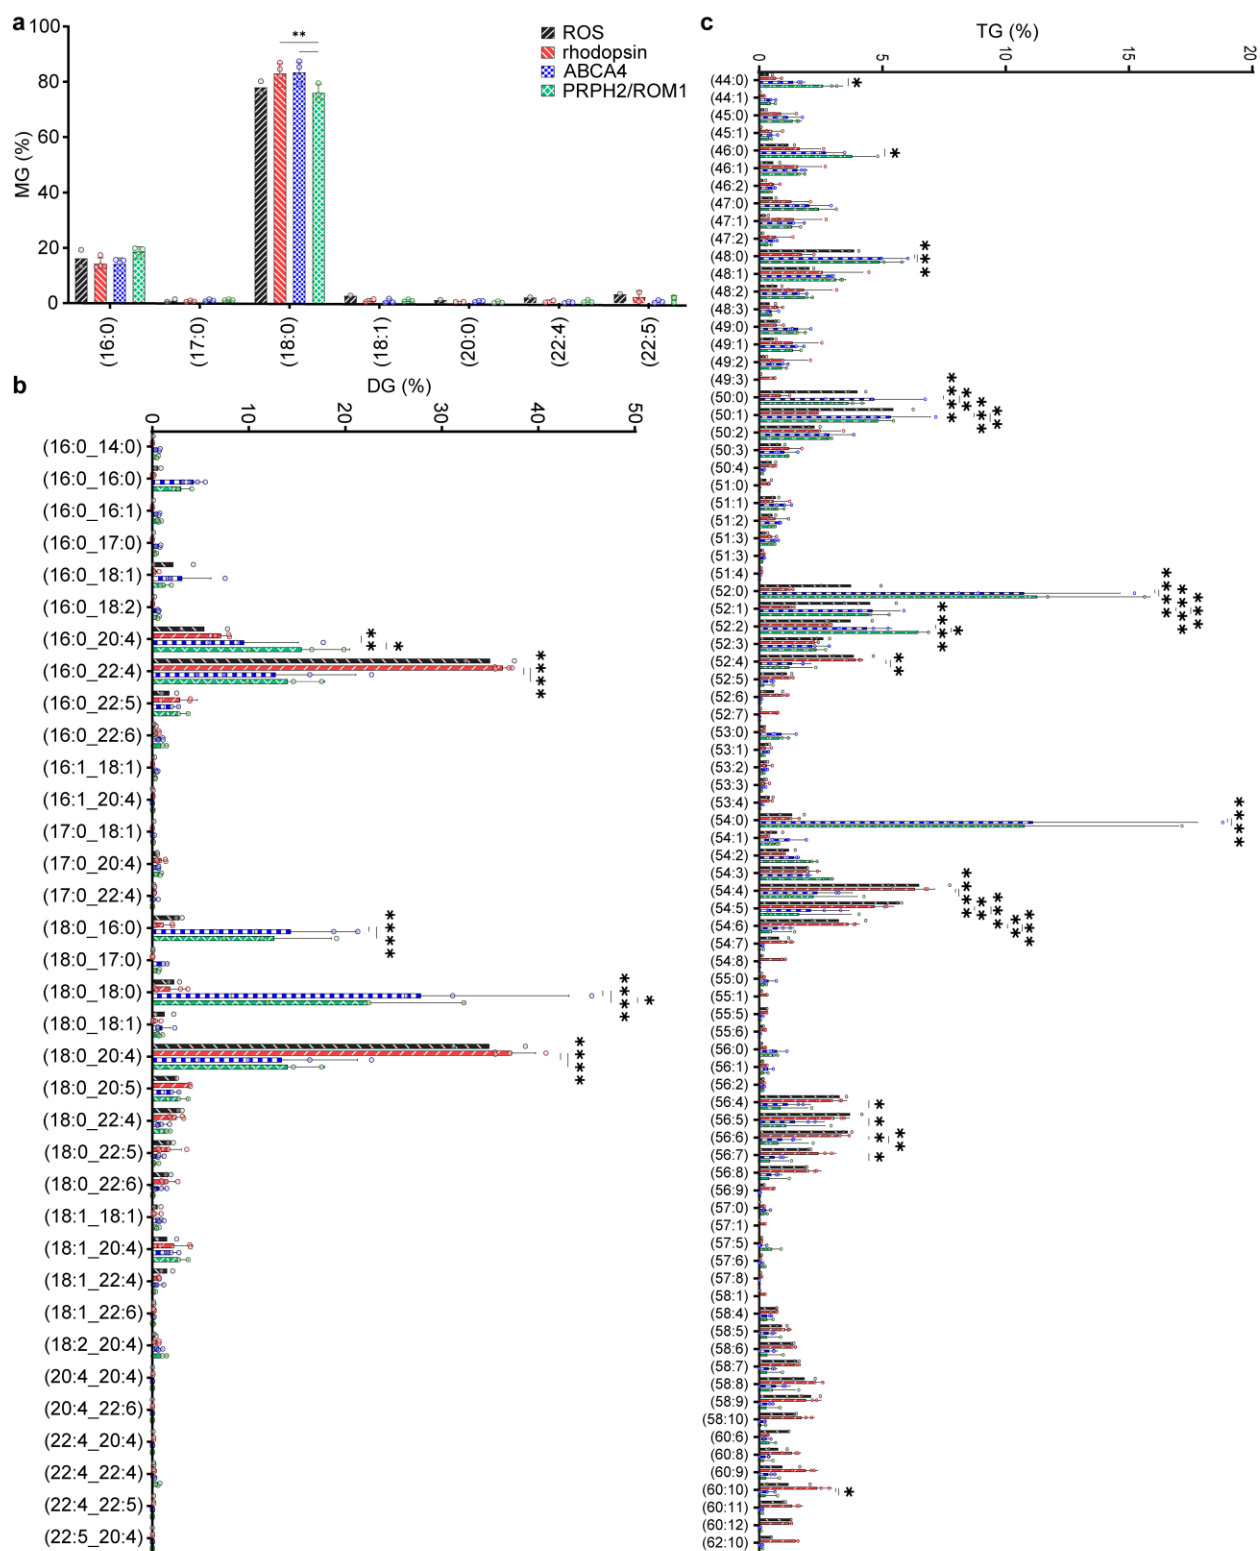

1374

1375 **Supplemental Figure 3.** Complete set of detected species for mono-, di-, and triacylglycerides. (a-c) Every

1376 detected species of lipid that copurified with each sample is shown as a percentage of each respective class

*Distinct membrane environments of ROS disks*

1377 (class noted on y-axis). Triacylglyceride chain lengths and unsaturation levels summed together. Total ROS:  
1378 black forward stripe; rhodopsin: red backward stripe; ABCA4: blue checker; PRPH2/ROM1: green  
1379 diamond. Number of measurements for each sample at each species varies, and is noted by the individual  
1380 data points for each bar. Percent composition was calculated for each sample by dividing the area under the  
1381 curve for each species in a class by the total area under the curve for that class, measured *via* LC-MS after  
1382 correction for variations in internal standard area, sample mass, and sample injection volume. Statistics are  
1383 determined using two-way ANOVA with Tukey's multiple comparisons post-hoc test between samples that  
1384 had at least 3 detected replicates. Statistical significance values are indicated as follows: \*,  $P < 0.05$ ; \*\*,  $P < 0.01$ ;  
1385 \*\*\*,  $P < 0.001$ ; \*\*\*\*,  $P < 0.0001$ .

1386

1387

1388

1389

1390

1391

1392

1393

1394

1395

1396

1397

1398

1399

1400

1401

1402

*Distinct membrane environments of ROS disks*

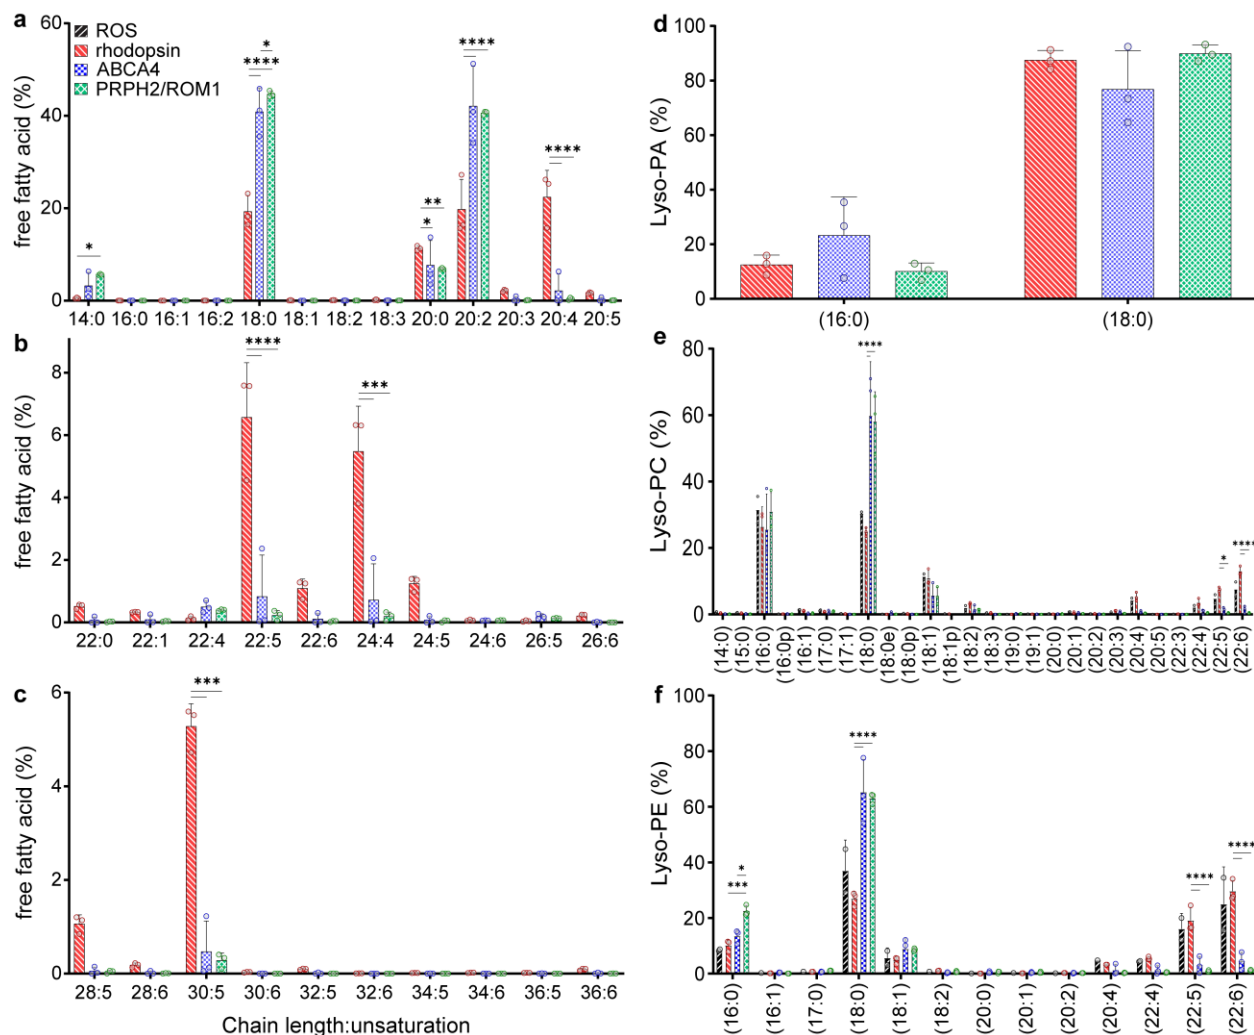

1403

1404 **Supplemental Figure 4.** Every detected species of FFA and Lyso-PL, relative to total species of each class.

1405 (a-f) Every detected species of FFA and lyso-PL that copurified with each sample is shown as a percentage

1406 of each respective class (class noted on y-axis). Total ROS: black forward stripe; rhodopsin: red backward

1407 stripe; ABCA4: blue checker; PRPH2/ROM1: green diamond. Number of measurements for each sample

1408 at each species varies, and is noted by the individual data points for each bar (open circles). Percent

1409 composition was calculated for each sample by dividing the area under the curve for each species in a class

1410 by the total area under the curve for that class, measured *via* LC-MS after correction for variations in

1411 internal standard area, sample mass, and sample injection volume. Statistics were determined using two-

1412 way ANOVA with Tukey's multiple comparisons post-hoc test. Statistical significance values are indicated

1413 as follows: \*,  $P < 0.05$ ; \*\*,  $P < 0.01$ ; \*\*\*,  $P < 0.001$ ; \*\*\*\*,  $P < 0.0001$ .

*Distinct membrane environments of ROS disks*

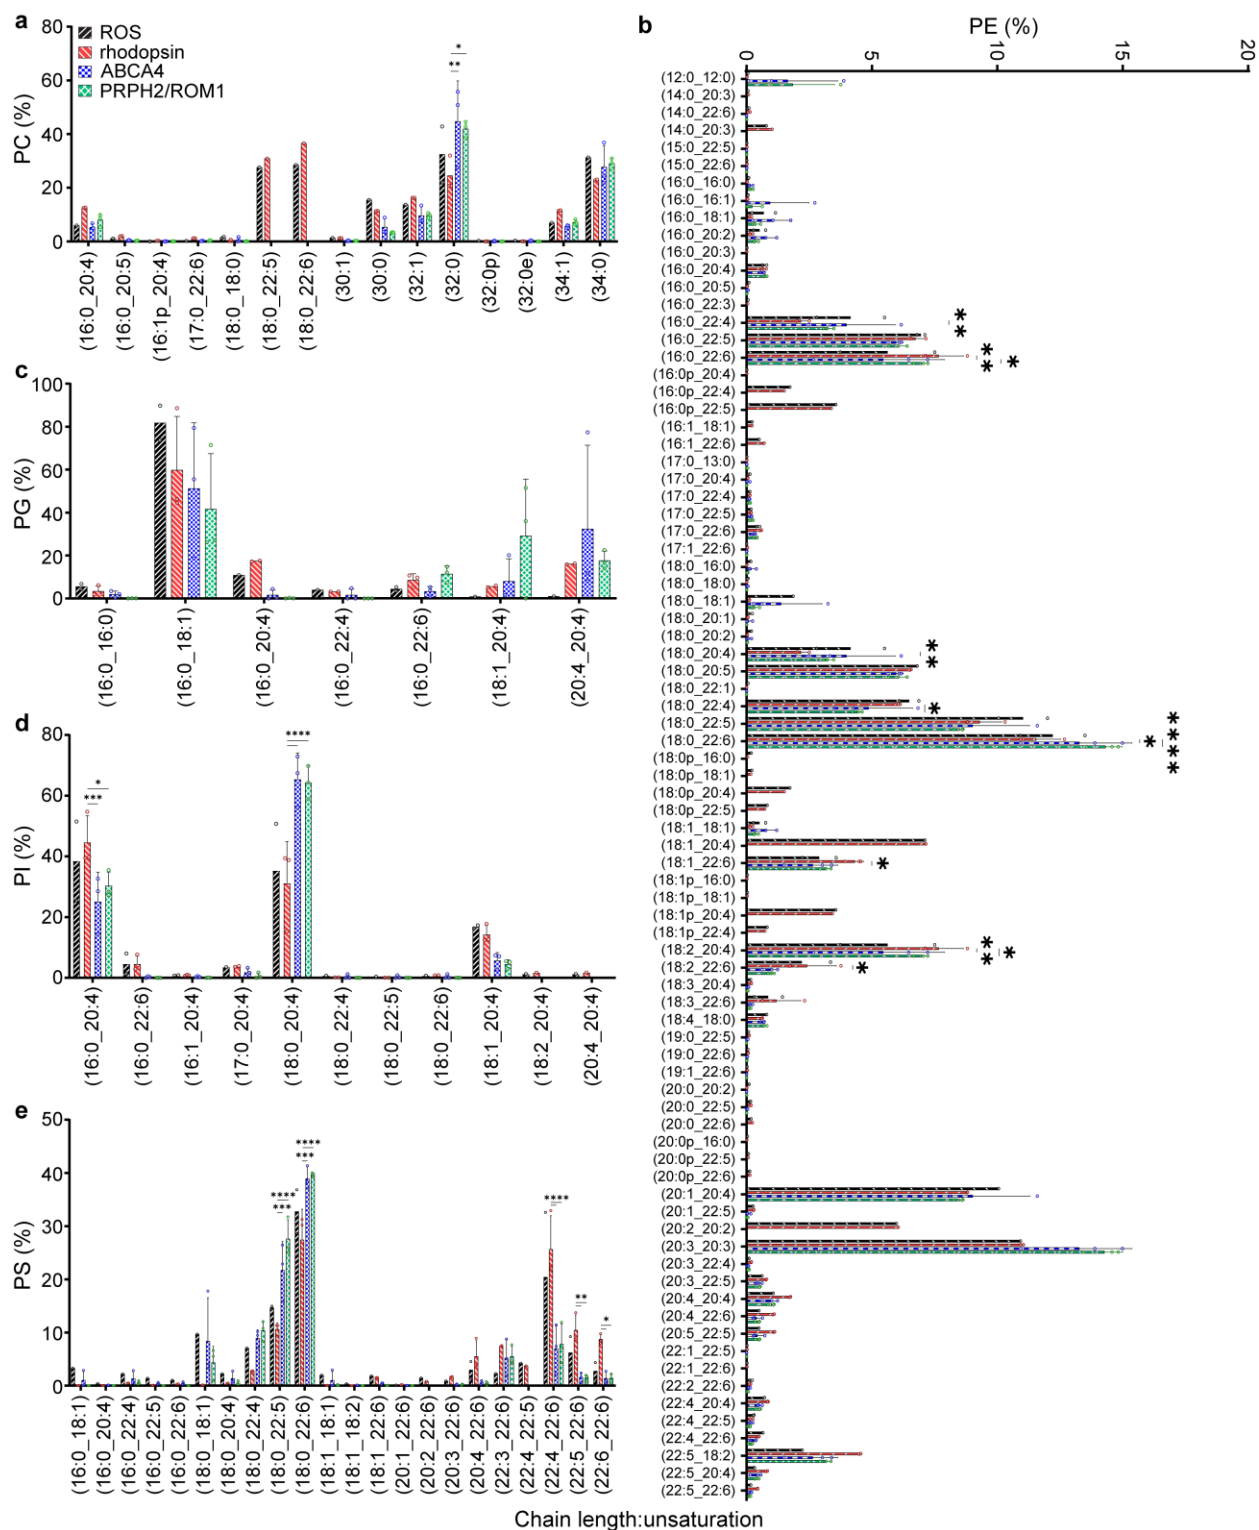

1414

1415 **Supplemental Figure 5.** Every detected species of PL, relative to total species of each class. (a-e) Every

1416 detected species of PL that copurified with each sample is shown as a percentage of each respective class

*Distinct membrane environments of ROS disks*

1417 (class noted on y-axis). Total ROS: black forward stripe; rhodopsin: red backward stripe; ABCA4: blue  
1418 checker; PRPH2/ROM1: green diamond. Number of measurements for each sample at each species varies,  
1419 and is noted by the individual data points for each bar (open circles). Percent composition was calculated  
1420 for each sample by dividing the area under the curve for each species in a class by the total area under the  
1421 curve for that class, measured *via* LC-MS after correction for variations in internal standard area, sample  
1422 mass, and sample injection volume. Statistics were determined using two-way ANOVA with Tukey's  
1423 multiple comparisons post-hoc test. Statistical significance values are indicated as follows: \*,  $P < 0.05$ ; \*\*,  
1424  $P < 0.01$ ; \*\*\*,  $P < 0.001$ ; \*\*\*\*,  $P < 0.0001$ .
